# Supplementary material for: Antibiotic combination therapy versus monotherapy for the treatment of infections due to carbapenem-resistant Gram-negative bacteria： a systematic review and meta-analysis
Source: Research Square preprint supplement (doi:10.21203/rs.3.rs-2036079/v1), 2022-09-12
Supplement: Supplementary file 1 [file 0cc7e3bb739ce5387926eb3f.docx]

**Supplemental Content**

**eTable 1. Specific search strategy for PubMed**

**eTable 2. Reasons for Exclusions**

**eTable 3. Characteristics of studies included in the meta-analysis**

**eTable 4. MINORS items for non-randomized studies**

**eFigure1. eFigure1. Bias of 5 RCTs in RoB 2.0**

**eFigure 2. Funnel plot from stata12.0**

**eFigure3. Subgroup analyses on mortality at the certain time point in the process of treatment**

**eFigure4. Subgroup analyses on mortality according to study design**

**eFigure5. Comparison patients admitted to the ICU of mortality between combination therapy and monotherapy**

**eFigure 6. Subgroup analyses forest plot regarding specific organism were performed**

**eFigure 7. Comparison of mortality of colistin-based and CAZ-AVI-based regimens, CAZ-AVI, ceftazidime-avibactam**

**eFigure 8. Comparison of clinical success for treating CRGNB**

**eFigure9. Comparison of clinical success for treating CRE**

**eFigure10. Comparison of clinical success for specific organisms**

**eFigure11. Comparison of microbiological eradication for treating CRGNB**

**eFigure12. Comparison of microbiological eradication for treating CRE**

**eFigure13. Comparison of microbiological eradication for specific organisms**

**eFigure14. GRADE summary of findings on mortality (5 RCTs, 45 NRSIs)**

**This supplemental material has been provided by the authors to give readers additional information about their work.**

**eTable 1. Specific search strategy for PubMed**

| database | Search strategy |
| --- | --- |
| PubMed | **((((carbapenem OR carbapenems OR imipenem OR meropenem OR ertapenem OR doripenem) AND (resistan*)) OR (carbapenemase-producing)) AND (Gram-negative bacilli OR Enterobacteriaceae OR K. pneumoniae OR A.baumannii OR Escherichia coli OR Klebsiella pneumoniae OR Salmonella OR Shigella OR Proteus OR Serratia OR Citrobacter OR Enterobacter OR Acinetobacter baumannii OR Pseudomonas)) AND (random* OR prospective OR retrospective OR cohort OR observational OR blind)** |

**eTable 2. Reasons for Exclusions**

| 1 | patients without CR-GNB | 14 | Winston_1991[1], Solomkin_2015[2], Samonis_2009[3], Shin_2012[4], Balandin_2022[5], Ozvatan_2016[6], Lauf_2014[7], Lucht_1994[8], Cometta_1994[9], Qin_2017[10], Heyland_2008[11], Solomkin_1985[12], Xiao_2019[13], Kim_2014[14] |
| --- | --- | --- | --- |
| 2 | the number of participants not up to criteria: did not provide sufficient data to calculate an odds ratio for mortality | 11 | Tascini_2006[15], Nagvekar_2021[16], Chen_2020[17], Cetin_2016[18], Gualtero_2020[19], Britt_2018[20], Cicora_2013[21], Guner_2011[22], Seo_2021[23], Fink, D. L. 2019[24], Krapp_2017[25] |
| 3 | sulbactam/relebactam monotherapy | 7 | Fitzpatrick_2022[26], Lee_2013[27], Lin_2015[28], Motsch_2020[29], Qu_2021[30], Santimaleeworagun_2011[31], Sims_2017[32] |
| 4 | inhalational or intratracheal administration | 5 | Ryan_2018[33], Khawcharoenporn_2018[34], Naesens_2011[35], Shields_2016[36], Sousa_2018[37] |
| 5 | conclusions but no the raw data | 3 | Balkan_2021[38], Bulut_2020[39], Lespada_2018[40] |
| 6 | secondary analysis | 3 | Dickstein_2019[41], Russo_2018[42], Zak-Doron_2018[43] |
| 7 | healthy participants | 3 | Lickliter_2020[44], Merdjan_2015[45], Tominaga_2015[46] |
| 8 | single-arm researches | 2 | Wang_2021[47], Saballs_2006[48] |
| 9 | did not use mortality, clinical success or microbiological eradication as an outcome measure | 2 | Qureshi_2020[49], Christoff_2010[50] |
| 10 | protocols | 2 | Ahn_2021[51], Dickstein_2016[52] |
| 11 | colonization rather than infection | 1 | Rodriguez_2008[53] |
| 12 | age distribution | 1 | Li_2019[54] |
| 13 | most participants overlap with another literature | 1 | Machuca_2019[55] |

1. Winston DJ, Ho WG, Bruckner DA, Champlin RE: **Beta-lactam antibiotic therapy in febrile granulocytopenic patients. A randomized trial comparing cefoperazone plus piperacillin, ceftazidime plus piperacillin, and imipenem alone**. *Annals of internal medicine* 1991, **115**:849‐859.

2. Solomkin J, Hershberger E, Miller B, Popejoy M, Friedland I, Steenbergen J, Yoon M, Collins S, Yuan G, Barie PS *et al*: **Ceftolozane/Tazobactam Plus Metronidazole for Complicated Intra-abdominal Infections in an Era of Multidrug Resistance: results From a Randomized, Double-Blind, Phase 3 Trial (ASPECT-cIAI)**. *Clinical infectious diseases* 2015:1462‐1471.

3. Samonis G, Karageorgopoulos DE, Kofteridis DP, Matthaiou DK, Sidiropoulou V, Maraki S, Falagas ME: **Citrobacter infections in a general hospital: characteristics and outcomes**. *European Journal of Clinical Microbiology & Infectious Diseases* 2009, **28**:61-68.

4. Shin JA, Chang YS, Kim HJ, Kim SK, Chang J, Ahn CM, Byun MK: **Clinical Outcomes of Tigecycline in the Treatment of Multidrug-Resistant Acinetobacter baumannii Infection**. *Yonsei Medical Journal* 2012, **53**:974-984.

5. Balandin B, Ballesteros D, Pintado V, Soriano-Cuesta C, Cid-Tovar I, Sancho-Gonzalez M, Perez-Pedrero MJ, Chicot M, Asensio-Martin MJ, Silva JA *et al*: **Multicentre study of ceftazidime/avibactam for Gram-negative bacteria infections in critically ill patients**. *Int J Antimicrob Agents* 2022, **59**(3):106536.

6. Ozvatan T, Akalin H, Sinirtas M, Ocakoglu G, Yilmaz E, Heper Y, Kelebek N, Iscimen R, Kahveci F: **Nosocomial Acinetobacter pneumonia: Treatment and prognostic factors in 356 cases**. *Respirology* 2016, **21**(2):363-369.

7. Lauf L, Ozsvár Z, Mitha I, Regöly-Mérei J, Embil JM, Cooper A, Sabol MB, Castaing N, Dartois N, Yan J *et al*: **Phase 3 study comparing tigecycline and ertapenem in patients with diabetic foot infections with and without osteomyelitis**. *Diagnostic microbiology and infectious disease* 2014, **78**:469‐480.

8. Lucht RF, Fresard A, Berthelot P, Farizon F, Aubert G, Dorche G, Bousquet G: **Prolonged treatment of chronic Pseudomonas aeruginosa osteomyelitis with a combination of two effective antibiotics**. *Infection* 1994, **22**:276-280.

9. Cometta A, Baumgartner JD, Lew D, Zimmerli W, Pittet D, Chopart P, Schaad U, Herter C, Eggimann P, Huber O *et al*: **Prospective randomized comparison of imipenem monotherapy with imipenem plus netilmicin for treatment of severe infections in nonneutropenic patients**. *Antimicrobial agents and chemotherapy* 1994, **38**:1309-1313.

10. Qin X, Tran BG, Kim MJ, Wang L, Nguyen DA, Chen Q, Song J, Laud PJ, Stone GG, Chow JW: **A randomised, double-blind, phase 3 study comparing the efficacy and safety of ceftazidime/avibactam plus metronidazole versus meropenem for complicated intra-abdominal infections in hospitalised adults in Asia**. *Int J Antimicrob Agents* 2017, **49**(5):579-588.

11. Heyland DK, Dodek P, Muscedere J, Day A, Cook D, Canadian Critical Care Trials G: **Randomized trial of combination versus monotherapy for the empiric treatment of suspected ventilator-associated pneumonia**. *Crit Care Med* 2008, **36**(3):737-744.

12. Solomkin JS, Fant WK, Rivera JO, Alexander JW: **Randomized trial of imipenem/cilastatin versus gentamicin and clindamycin in mixed flora infections**. *American Journal of Medicine* 1985, **78**:85-91.

13. Xiao T, Yang K, Zhou Y, Zhang S, Ji J, Ying C, Shen P, Xiao Y: **Risk factors and outcomes in non-transplant patients with extended-spectrum beta-lactamase-producing Escherichia coli bacteremia: a retrospective study from 2013 to 2016**. *Antimicrob Resist Infect Control* 2019, **8**:144-154.

14. Kim YJ, Jun YH, Kim YR, Park KG, Park YJ, Kang JY, Kim SI: **Risk factors for mortality in patients with Pseudomonas aeruginosa bacteremia; retrospective study of impact of combination antimicrobial therapy**. *BMC Infectious Diseases* 2014, **14**:161-167.

15. Tascini C, Gemignani G, Palumbo F, Leonildi A, Tedeschi A, Lambelet P, Lucarini A, Piaggesi A, Menichetti F: **Clinical and microbiological efficacy of colistin therapy alone or in combination as treatment for multidrug resistant Pseudomonas aeruginosa diabetic foot infections with or without osteomyelitis**. *Journal of chemotherapy (Florence, Italy)* 2006, **18**:648-651.

16. Nagvekar V, Shah A, Unadkat VP, Chavan A, Kohli R, Hodgar S, Ashpalia A, Patil N, Kamble R: **Clinical Outcome of Patients on Ceftazidime-Avibactam and Combination Therapy in Carbapenem-resistant Enterobacteriaceae**. *Indian J Crit Care Med* 2021, **25**(7):780-784.

17. Chen WH, Sun LX, Guo LJ, Cao B, Liu YM, Zhao L, Lu BH, Li BB, Chen JY, Wang C: **Clinical outcomes of ceftazidime-avibactam in lung transplant recipients with infections caused by extensively drug-resistant gram-negative bacilli**. *Annals of Translational Medicine* 2020, **8**.

18. Cetin CB, Ozer Turk D, Senol S, Dinc Horasan G, Tunger O: **Colistin efficacy in the treatment of multidrug-resistant and extremely drug-resistant gram-negative bacterial infections**. *Turkish Journal of Medical Sciences* 2016, **46**:1379-1384.

19. Gualtero S, Valderrama S, Valencia M, Rueda D, Muñoz-Velandia O, Ariza B, Cortes G, Salgado D, Porras Y, Niño A: **Factors associated with mortality in Infections caused by Carbapenem-resistant Enterobacteriaceae**. *Journal of infection in developing countries* 2020, **14**:654-659.

20. Britt NS, Ritchie DJ, Kollef MH, Burnham CAD, Durkin MJ, Hampton NB, Micek ST: **Importance of Site of Infection and Antibiotic Selection in the Treatment of Carbapenem-Resistant Pseudomonas aeruginosa Sepsis**. *Antimicrobial Agents and Chemotherapy* 2018, **62**.

21. Cicora F, Mos F, Paz M, Allende NG, Roberti J: **Infections With blaKPC-2-Producing Klebsiella pneumoniae in Renal Transplant Patients: A Retrospective Study**. *Transplantation Proceedings* 2013, **45**:3389-3393.

22. Guner R, Hasanoglu I, Keske S, Kalem AK, Tasyaran MA: **Outcomes in patients infected with carbapenem-resistant Acinetobacter baumannii and treated with tigecycline alone or in combination therapy**. *Infection* 2011, **39**:515-518.

23. Seo H, Bae S, Kim MJ, Chong YP, Kim SH, Lee SO, Choi SH, Kim YS, Jung J: **Risk Factors for Mortality in Patients with Klebsiella pneumoniae Carbapenemase-producing K. pneumoniae and Escherichia coli bacteremia**. *Infection & chemotherapy* 2021, **53**:528-538.

24. Fink DL, Collins S, Barret R, Pollara G, Marks M, Logan S: **Shortening duration of ertapenem in outpatient parenteral antimicrobial therapy for complicated urinary tract infections: A retrospective study**. *Plos One* 2019, **14**.

25. Krapp F, Grant JL, Sutton SH, Ozer EA, Barr VO: **Treating complicated carbapenem-resistant enterobacteriaceae infections with ceftazidime/avibactam: a retrospective study with molecular strain characterization**. *International Journal of Antimicrobial Agents* 2017, **49**:770-773.

26. Fitzpatrick MA, Suda KJ, Poggensee L, Vivo A, Wilson G, Jones MM, Evans M, Safdar N, Evans CT: **Treatment of extensively-drug resistant (XDR) Acinetobacter and impact on clinical outcomes in U.S. veterans affairs (VA) medical centers**. *Am J Infect Control* 2022.

27. Lee YT, Tsao SM, Hsueh PR: **Clinical outcomes of tigecycline alone or in combination with other antimicrobial agents for the treatment of patients with healthcare-associated multidrug-resistant Acinetobacter baumannii infections**. *Eur J Clin Microbiol Infect Dis* 2013, **32**(9):1211-1220.

28. Lin HS, Lee MH, Cheng CW, Hsu PC, Leu HS, Huang CT, Ye JJ: **Sulbactam treatment for pneumonia involving multidrug-resistant Acinetobacter calcoaceticus-Acinetobacter baumannii complex**. *Infect Dis (Lond)* 2015, **47**(6):370-378.

29. Motsch J, Murta de Oliveira C, Stus V, Koksal I, Lyulko O, Boucher HW, Kaye KS, File TM, Brown ML, Khan I *et al*: **RESTORE-IMI 1: A Multicenter, Randomized, Double-blind Trial Comparing Efficacy and Safety of Imipenem/Relebactam vs Colistin Plus Imipenem in Patients With Imipenem-nonsusceptible Bacterial Infections**. *Clin Infect Dis* 2020, **70**(9):1799-1808.

30. Qu J, Feng C, Li H, Lv X: **Antibiotic strategies and clinical outcomes for patients with carbapenem-resistant Gram-negative bacterial bloodstream infection**. *Int J Antimicrob Agents* 2021, **57**(3):106284.

31. Santimaleeworagun W, Wongpoowarak P, Chayakul P, Pattharachayakul S, Tansakul P, Garey KW: **Clinical outcomes of patients infected with carbapenem-resistant Acinetobacter baumannii treated with single or combination antibiotic therapy**. *Journal of the Medical Association of Thailand* 2011, **94**:863-870.

32. Sims M, Mariyanovski V, McLeroth P, Akers W, Lee YC, Brown ML, Du J, Pedley A, Kartsonis NA, Paschke A: **Prospective, randomized, double-blind, Phase 2 dose-ranging study comparing efficacy and safety of imipenem/cilastatin plus relebactam with imipenem/cilastatin alone in patients with complicated urinary tract infections**. *J Antimicrob Chemother* 2017, **72**(9):2616-2626.

33. K. R, Shields, M. Hong Nguyen, Liang Chen, Ellen G. Press, Barry N. Kreiswirth, Clancy CJ: **Pneumonia and Renal Replacement Therapy Are Risk Factors for Ceftazidime-Avibactam Treatment Failures and Resistance among Patients with Carbapenem-Resistant Enterobacteriaceae Infections**. *Antimicrobial Agents and Chemotherapy* 2018, **62**:2497-2517.

34. Khawcharoenporn T, Chuncharunee A, Maluangnon C, Taweesakulvashra T, Tiamsak P: **Active monotherapy and combination therapy for extensively drug-resistant Pseudomonas aeruginosa pneumonia**. *Int J Antimicrob Agents* 2018, **52**(6):828-834.

35. Naesens R, Vlieghe E, Verbrugghe W, Jorens P, Ieven M: **A retrospective observational study on the efficacy of colistin by inhalation as compared to parenteral administration for the treatment of nosocomial pneumonia associated with multidrug-resistant Pseudomonas aeruginosa**. *BMC Infectious Diseases* 2011, **11**:317-324.

36. Shields RK, Potoski BA, Haidar G, Hao B, Doi Y, Chen L, Press EG, Kreiswirth BN, Clancy CJ, Nguyen MH: **Clinical outcomes, drug toxicity and emergence of ceftazidime-avibactam resistance among patients treated for carbapenem-resistant Enterobacteriaceae infections**. *Clinical Infectious Diseases* 2016, **63**:1615-1618.

37. Sousa A, Perez-Rodriguez MT, Soto A, Rodriguez L, Perez-Landeiro A, Martinez-Lamas L, Nodar A, Crespo M: **Effectiveness of ceftazidime/avibactam as salvage therapy for treatment of infections due to OXA-48 carbapenemase-producing Enterobacteriaceae**. *J Antimicrob Chemother* 2018, **73**(11):3170-3175.

38. Balkan, II, Alkan M, Aygun G, Kuskucu M, Ankarali H, Karagoz A, Sen S, Arsu HY, Bicer M, Kaya SY *et al*: **Colistin resistance increases 28-day mortality in bloodstream infections due to carbapenem-resistant Klebsiella pneumoniae**. *European Journal of Clinical Microbiology & Infectious Diseases* 2021, **40**:2161-2170.

39. Bulut D, Çi̇Çek Şentürk G: **Bloodstream infections caused by carbapenem-resistant enterobacteriaceae: Risk factors, treatment and effects on mortality**. *Flora* 2020, **25**:401-412.

40. Lespada MI, Córdova E, Roca V, Gómez N, Badía M, Rodríguez C: **Bacteremia caused by Klebsiella pneumoniae carbapenemase (KPC)-producing K. pneumoniae. A retrospective study of 7 years**. *Rev Esp Quimioter* 2018.

41. Dickstein Y, Lellouche J, Ben Dalak Amar M, Schwartz D, Nutman A, Daitch V, Yahav D, Leibovici L, Skiada A, Antoniadou A *et al*: **Treatment Outcomes of Colistin- and Carbapenem-resistant Acinetobacter baumannii Infections: an Exploratory Subgroup Analysis of a Randomized Clinical Trial**. *Clinical infectious diseases* 2019, **69**:769‐776.

42. Russo A, Falcone M, Gutierrez-Gutierrez B, Calbo E, Almirante B, Viale PL, Oliver A, Ruiz-Garbajosa R, Gasch O, Gozalo M *et al*: **Predictors of outcome in patients with severe sepsis or septic shock due to extended-spectrum beta-lactamase-producing Enterobacteriaceae**. *International Journal of Antimicrobial Agents* 2018, **52**:577-585.

43. Zak-Doron Y, Benattar YD, Pfeffer I, Daikos GL, Skiada A, Antoniadou A, Durante-Mangoni E, Andini R, Cavezza G, Leibovici L *et al*: **The Association Between Empirical Antibiotic Treatment and Mortality in Severe Infections Caused by Carbapenem-resistant Gram-negative Bacteria: A prospective study**. *Clinical Infectious Diseases* 2018, **67**:1815-1823.

44. Lickliter JD, Lawrence K, O'Donnell J, Isaacs R: **Safety, Pharmacokinetics, and Drug-Drug Interaction Potential of Intravenous Durlobactam, a beta-Lactamase Inhibitor, in Healthy Subjects**. *Antimicrob Agents Chemother* 2020, **64**(7).

45. Merdjan H, Rangaraju M, Tarral A: **Safety and pharmacokinetics of single and multiple ascending doses of avibactam alone and in combination with ceftazidime in healthy male volunteers: results of two randomized, placebo-controlled studies**. *Clin Drug Investig* 2015, **35**(5):307-317.

46. Tominaga N, Edeki T, Li J, Learoyd M, Bouw MR, Das S: **Phase I study assessing the safety, tolerability, and pharmacokinetics of avibactam and ceftazidime-avibactam in healthy Japanese volunteers**. *J Infect Chemother* 2015, **21**(8):551-558.

47. Wang ZQ, Guo ZL, Feng H, Fu C, Zhao GY, Ma K, Zhu L, Chen G: **Treatment of Donor-derived Carbapenem-resistant Klebsiella pneumoniae Infection after Renal Transplantation with Tigecycline and Extended-infusion Meropenem**. *Curr Med Sci* 2021, **41**(4):770-776.

48. Saballs M, Pujol M, Tubau F, Pena C, Montero A, Dominguez MA, Gudiol F, Ariza J: **Rifampicin/imipenem combination in the treatment of carbapenem-resistant Acinetobacter baumannii infections**. *J Antimicrob Chemother* 2006, **58**(3):697-700.

49. Qureshi S, Naveed AB, Yousafzai MT, Ahmad K, Ansari S, Lohana H, Mukhtar A, Qamar FN: **Response of extensively drug resistant Salmonella Typhi to treatment with meropenem and azithromycin, in Pakistan**. *PLoS Negl Trop Dis* 2020, **14**(10):e0008682.

50. Christoff J, Tolentino J, Mawdsley E, Matushek S, Pitrak D, Weber SG: **Optimizing empirical antimicrobial therapy for infection due to gram-negative pathogens in the intensive care unit: utility of a combination antibiogram**. *Infect Control Hosp Epidemiol* 2010, **31**(3):256-261.

51. Ahn ST, Han DE, Lee DH, Kim JW, Park HS, Moon DG, Oh MM: **Single-dose amikacin plus 7 days of amoxicillin/clavulanate to treat acute cystitis caused by extended-spectrum beta-lactamase-producing Escherichia coli: A retrospective cohort study**. *Investig Clin Urol* 2021, **62**(3):310-316.

52. Dickstein Y, Leibovici L, Yahav D, Eliakim-Raz N, Daikos GL, Skiada A, Antoniadou A, Carmeli Y, Nutman A, Levi I *et al*: **Multicentre open-label randomised controlled trial to compare colistin alone with colistin plus meropenem for the treatment of severe infections caused by carbapenem-resistant Gram-negative infections (AIDA): a study protocol**. *BMJ Open* 2016, **6**(4):e009956.

53. Rodriguez Guardado A, Blanco A, Asensi V, Perez F, Rial JC, Pintado V, Bustillo E, Lantero M, Tenza E, Alvarez M *et al*: **Multidrug-resistant Acinetobacter meningitis in neurosurgical patients with intraventricular catheters: assessment of different treatments**. *J Antimicrob Chemother* 2008, **61**(4):908-913.

54. Li C, Li Y, Zhao Z, Liu Q, Li B: **Treatment options and clinical outcomes for carbapenem-resistant Enterobacteriaceae bloodstream infection in a Chinese university hospital**. *J Infect Public Health* 2019, **12**(1):26-31.

55. Machuca I, Gutierrez-Gutierrez B, Rivera-Espinar F, Cano A, Gracia-Ahufinger I, Guzman-Puche J, Marfil-Perez E, Perez-Nadales E, Caston JJ, Bonomo RA *et al*: **External validation of the INCREMENT-CPE mortality score in a carbapenem-resistant Klebsiella pneumoniae bacteraemia cohort: the prognostic significance of colistin resistance**. *Int J Antimicrob Agents* 2019, **54**(4):442-448.

eTable 3. Characteristics of studies included in the meta-analysis

| Author, year | period of research | Age(average) | Nosocomial case (%) | Underlying diseases/Comorbidity | admission to ICU | Assessment of severity of illness | duration of treatment(days) | Regimens-MT | CT-Regimens | outcomes |
| --- | --- | --- | --- | --- | --- | --- | --- | --- | --- | --- |
| Lee 2020 | 2010.8-2015.8 | NR | NR | DM, CKD, malignancy, liver cirrhosis | NR | McCabe classification, PBS | NR | colistin, cefepime, carbapenem, piperacillin-tazobactam, levofloxacin, ertapenem | carbapenem/amikacin, carbapenem/colistin, meropenem/ciprofloxacin, colistin/ciprofloxacin, colistin/amikacin, colistin/cefepime, cefepime/amikacin, piperacillin-tazobactam/amikacin, ciprofloxacin/amikacin, meropenem/amikacin, ciprofloxacin/imipenem | 30-day/in-hospital mortality, sepsis-related mortality, clinical failure, microbiological failure |
| Qureshi 2012 | 2005-2009 | NR | NR | DM, CRF, COPD, CVD, chronic liver disease, malignancy, transplant, HIV, others | 20(59) | APACHE II score, in ICU at enrollment, length of stay before bacteremia | NR | colistin, tigecycline, carbapenem, gentamicin, ampicillin-sulbactam, piperacillin-tazobactam | colistin/carbapenem, colistin/tigecycline, colistin/fluoroquinolone, tigecycline/carbapenem, tigecycline/aminoglycoside, carbapenem/fluoroquinolone, cefepime/gentamicin, aztreonam/fluoroquinolone | 28-day mortality |
| Oliveira 2014 | 2009.10-2013.6 | 56.00 | 118(100) | OST, HSCT, cancer, DM, HIV, CRF | 57(48) | APACHE II score, at the time of patient's admission to the unit | 14.0 | carbapenem, polymyxin, aminoglycoside, tigecycline | Polymyxin/carbapenem, aminoglycoside /carbapenem, aminoglycoside/tigecycline, tigecycline/carbapenem, polymyxin/ aminoglycoside, polymyxin/aminoglycoside /carbapenem, tigecycline/carbapenem/polymyxin, aminoglycoside/polymyxin/tigecycline, aminoglycoside/carbapenem/tigecycline, aminoglycoside/polymyxin/carbapenem/tigecycline | 30-day mortality (all infection), 30-day mortality(bacteremia) |
| Park 2019 | 2006.11-2018.2 | 66.97 | 71(100) | DM, CVD, chronic lung disease, renal impairment, chronic liver disease, malignancy, | NR | CCI, PBS, Steroid/immunosuppressant use | 8.6 | colistin | colistin/meropenem | 14-day mortality, 14-day clinical success |
| Freire 2019 | 2013-2017 | NR | NR | NR | NR | NR | 17.0 | fosfomycin | fosfomycin combinated with others | clinical sussess |
| Tuon 2016 | 2010.1-2014.8 | NR | NR | NR | NR | NR | NR | polymin B, tigecycline, amikacin | polymyxin B/tigecycline | 30-day mortality |
| Wang 2018 | 2013-2017 | NR | NR | NR | NR | CCI, PBS | NR | tigecycline-based, carbapenem/quinolones, aminoglycoside-based, including β-lactam/β-lactamases inhibitor | tigecycline, carbapenem, aminoglycosides, quinolones, trimethoprim/sulfamethoxazole | in-hospital mortality, 14-day mortality |
| Önal 2019 | 2016.12-2017.12 | 61.69 | NR | malignancy, hypertension, CRF, DM, CAD, nephrolithiasis, nephrolithiasis, SOT | 36(36) | NR | 26.6 | fluoroquinolones, ertapenem, third of generation of cephalosporins | double-carbapenem regimens, colistin-based regimen, tigecycline containing regimen | 30-day mortality, microbiological eradication |
| LIAO 2015 | 2012.1-2014.11 | 67.20 | 84(80.8) | DM, COPD, HF, renal failure, gastrointestinal surgery, solid malignancies | 87(84) | NR | NR | pipercillin/sulbactam, aminoglycosides, 3rd/4th generation cephalosporin, quinolones, meropenem, imipenem, tigecycline, minocyline | fosfomycin-based combination, tigecyline-based combination, carbapenem-based combination | mortality |
| Tan 2020 | 2010.1-2017.12 | 54.60 | NR | solid tumor haematological, malignancy, CRF, ARF, cardiac dysfunction diabetes, hypertension, vascular disease | 175(100) | septic shock | 32.0 | carbapenem, aminoglycoside, tigecycline, cephalosporin, semi-synthetic penicillin/sulbactam, other | carbapenem-containing regimen, carbapenem-sparing regimen | 14-day/28-day mortality, mortality due to infection, treatment success |
| Abdelsalam 2018 | 2016.5-2016.10 | 56.05 | 60(100) | malignancy, heart dysfunction, lung dysfunction, DM, urogenital disorder, CRF, hepatic disease, haematological disoider, neurological disorder | 60(100) | APACHE II score, SOFA score | NR | colistin | colistin/meropenem | in-hospital mortality |
| Claudia 2016 | 2011.3-2012.12 | 55.70 | NR | surgery, dialyses, previous colonization | 98(77) | severe sepsis, septic shock | NR | colistin, tigecycline, carbapenem, aminoglycoside | use of more two or more drugs | infection-related mortality |
| Sirijatuphat 2014 | 2010.1-2011.3 | 68.30 | NR | DM, cardiovascular disease, cerebrovascular disease, CKD, chronic lung disease, malignancy, post-surgery | NR | APACHE II score, mechanical ventilator use | 47.0 | colistin | colistin/fosfomycin | 28-day mortality, 28-day infection-related mortality, microbiological eradication (first 72h, end of study treatment) |
| P.Nadales 2019 | 2004-2016 | NR | NR | NR | NR | NR | NR | 1 single active drug | 2 or more active drugs | 30-day mortality |
| Wang 2016 | 2013.1.1-2016.12.31 | 59.49 | NR | cerebrovascular disease, dementia, CKD | 55(40) | CCI, APACHE II score | NR | cephalosporins, carbapenem, β-lactam/β-lactamase inhibitor, fluoroquinolones | cephalpsporins/aminoglycosides, cephalpsporins/fluoroquinolones, carbapenems/fluoroquinolones, carbapenems/β-lactam-β-lactamase inhibitor, cephalpsporins/carbapenems or with a third drug | in-hospital mortality, total length of stay |
| Tumbarello 2012 | 2010.1.1-2011.6.30 | 62.32 | NR | DM, HF, CRF, solid tumor, hematological malignancy | 53(42) | APACHE II score, CCI | 69.3 | tigecycline, colistin, gentamicin | tigecycline/colistin, tigecycline/gentamicin, colistin/gentamicin, gentamicin/meropenem, tigecycline/meropenem, colistin/meropenem, tigecycline/colistin/meropenem, other 3-drug combinations | 30-day mortality |
| RIHANI 2012 | 2008.01-2009.12 | NR | NR | NR | NR | NR | NR | colistin, meropenem, aminoglyciside, tigecycline | meropenem/amikacin, meropenem/tigecycline, and others | clinical success, microbiological eradication |
| Machuca 2017 | 2012.07-2016.02 | 65.08 | 151(93.3) | CKD, DM, COPD, active solid tumor, transplant | 56(54) | PBS, septic shock | 16.9 | tigecycline, gentamicin, fosfomycin, | tigecycline/gentamincin, tigecycline/fosfomycin, gentamicin/fosfomycin, tigecycline/fosfomycin/gentamicin | 30-day mortality |
| L.Corte´s 2014 | 2010.1.1-2010.3.31 | NR | NR | DM, COPD, malignancy, dialysis treatment, immunodeficiency | NR | PBS, present ICU admission | NR | colistin, carbapenem, tigecycline, tetracycline | colistin/tigecycline, carbapenem/tigecycline, colistin/carbapenem, colistin/aminoglycoside, colistin/rifampicin, carbapenem/aminoglycoside, tigecycline/rifampicin, tigecycline/aminoglycoside, colistin/tigecycline/carbapenem/aminoglycoside, colistin/tigecycline/aminoglycoside, tigecycline/carbapenem/rifampicin | 30-day mortality |
| Ghafur 2017 | 2011.1-2014.12 | 48.04 | NR | hematology, hemato-oncology, neurosurgical oncology, solid tumor, neurosurgery, others | 70(77) | APACHE II score, PBS | NR | colistin | colistin/meropenem, colistin/meropenem/tigecycline, colistin/tigecycline | 28-day mortality |
| Tumbarello 2015 | 2010.1.1-2013.12.31 | 68.00 | NR | COPD, CAD, CVD or dementia, solid tumor, haematological malignancy, SOT, liver disease, HIV infection/immunodeficiency, CKD, diabetes, neutropenia | 230(35) | shock, APACHE III score | NR | tigecycline, colistin, gentamicin | two-drug combination, there-drug combination | 14-day mortality |
| Capone 2012 | 2010.12-2011.5 | 69.00 | NR | immunosuppression, diabetes, COPD, CKD, cancer, chronic liver disease, | 44(45) | APACHE II score | 20.0 | gentamicin, colistin | colistin/tigecycline, colistin/fosfomycin, colistin/gentamicin, tigecycline/fosfomycin | in-hospital mortality |
| Katip 2020 | 2013.1.1-2017.8.31 | 62.77 | NR | NR | 206(64) | CCI, septic shock | 10.1 | colistin | colistin/meropenem | Clinical/microbiological response, mortality rate at the end of treatment |
| G.Gutiérrez 2017 | 2004.1.1-2013.12.31 | 66.00 | 298(86.9) | mental status, leukaemia or metastatic cancer, chronic liver disease, CKD | 123(36) | CCI, PBS, severe sepsis or septic shock | NR | colistin, meropenem or imipenem, active β-lactams, tigecycline, aminoglycosides, others | tigecycline included, colistin included, aminoglycosides included, fosfomycin included, others | 30-day mortality |
| Niu 2019 | 2012.1-2017.12 | 60.00 | NR | hypertension, hepatitis/cirrhosis, diabetes, renal insufficiency, coronary, respiratory, tumor, MOF, stroke, gastrointestinal bleeding | 55(26) | APACHE II score | NR | cefoperazone/sulbactam | cefoperazone/sulbactam combination therapy | 28-day mortality |
| Katip 2020* | 2015-2017 | 66.63 | NR | hypertension, cardiovascular disease, DM, CKD, COPD, malignancy, chronic liver disease | NR | CCI, APACHE II score, | 10.0 | colistin | colistin/meropenem | 30-day mortality, clinical/microbiological response |
| Amat 2017 | 2010.1-2012.12 | 57.00 | 81(68.6) | DM, COPD, immune-suppressed, liver cirrhosis, CKD | 12(10) | APACHE II score, CCI, septic shock | NR | colistin | tigecycline/colistin | 14-day/30-day mortality |
| Medeiros 2018 | 2015.8-2016.12 | 57.60 | NR | cardiovascular disease, cancer, chronic lung disease, CKD, cirrhosis, diabetes, HIV, central nervous system disease | 50(61) | PBS, CCI | NR | polymyxin B, meropenem, amikacin, polymyxin B/meropenem, amikacin/meropenem, polymyxin B/amikacin/meropenem(monotherapy: only one in vitro active agent or combination between one in vitro active agent plus one or more in vitro non-active agents) | polymyxin B/amikacin, polymyxin B/amikacin/meropenem, polymyxin B/meropenem, polymyxin B/amikacin/tigecycline, polymyxin B/amikacin/tigecycline | 30-day mortality |
| G.Simmonds 2016 | 2006-2013 | 61.61 | NR | neutropenia, others | 87(57) | PBS, septic shock, admission to ICU, | NR | SAA | SAA plus a BL, MAA without or plus a BL(SAA, single active agent; BL, β-lactam antibiotic; MAA, multiple active agents) | 30-day mortality |
| AYDEMIR 2012 | 2011.3-2012.3 | 61.00 | 43(100) | DM, CKD, hypertension, CHF, malignancy, cerebrovascular disease, trauma, operation | NR | APACHE II, SOFA score | 9.3 | colistin | colistin and rifampicin | inhospital/VAP-related mortality, clinical/microbiological response |
| Makris 2018 | NR | 56.75 | 39(100) | NR | 39(100) | SOFA score, APACHE II score | NR | colistin | colistin and ampicillin-sulbactam | 28-day mortality, clinical/microbiological response |
| Shi 2019 | 2007.7-2018.10 | 71.60 | 57(35.6) | DM, hypertension, hematologic malignancy, solid malignancy, CKD, chronic lung disease, CNS surgery, any surgery, neurologic disease | NR | APACHE II score | NR | colistin | colistin and carbapenem | 14-day/in-hospital mortality, clinical improvement/ microbiological eradication at day 14 |
| ÇETİN 2016 | 2014.1-2017.12 | 48.00 | NR | hypertension, DM, CKD, liver disease, malignancy | 84(100) | APACHE II score | NR | colistin and/or other antibiotics effective gram-positive bacteria | colistin/carbapenem, colistin/tigecycline | in-hospital mortality, 7-day mortality, 30-day mortality, microbiological eradication within 7 days |
| Paul 2018 | 2013.10.1-2016.12.31 | 66.00 | NR | dementia, CKD, malignancy, CHF, chronic pulmonary disease, immune suppressive therapy | 130(32) | CCI | NR | colistin | colistin and meropenem | clinical/ microbiological success, 28-day/14-day mortality |
| Yilmaz 2015 | 2011.1-2013.1 | 59.67 | NR | DM, COPD, CKD, malignancy, HF, immunosupression, trauma | 50(100) | SAPS2 | 11.9 | colistin | colistin and carbapenem | 28-day mortality, clinical/microbiological response |
| Zhang 2020 | 2014.6-2019.6 | 53.00 | NR | hypertension, diabetes, CKD, liver insufficiency, solid organ cancer, blood disease, CAD | 78(100) | APACHE II, SOFA score, septic shock | NR | carbapenem, cefoperazone-sulbactam, piperacillin-tazobactam, cefepime, ceftazidime | tigecycline/carbapenem, tigecycline/polymyxin B, tigecycline/piperacillin-tazobactam, tigecycline/aminoglycosides, tigecycline/cefoperazone-sulbactam, tigecycline/carbapenem/cefoperazone-sulbactam, tigecycline/aminoglycosides/carbapenem, tigecycline/carbapenem/polymyxin B, carbapenem/cefoperazone-sulbactam, carbapenem/aminoglycosides | 28-day mortality |
| Villegas 2016 | 2013.7-2014.12 | NR | NR | NR | NR | NR | NR | carbapenem, tigecycline | carbapenem/colistin or polymyxin B, carbapenem/colistin or polymyxin B/tigecycline, carbapenem/colistin or polymyxin B/aminoglycoside, carbapenem/tigecycline, carbapenem/aminoglycoside/polymyxin B/tigecycline, carbapenem/aminoglycoside/tigecycline, carbapenem/rifampin, polymyxin B/rifampin | mortalitly at the end of treatment or death |
| Karaiskos 2020 | 2018.1-2019.3 | 60.90 | 128(87.1) | NR | 74(50) | CCI, APACHE II score, SOFA score, sepsis, septic shock | NR | CAZ-AVI | CAZ-AVI/colistin, CAZ-AVI/aminoglycosides, CAZ-AVI/colistin/tigecycline, CAZ-AVI/tigecycline, CAZ-AVI/trimethoprim/sulfamethoxazole, CAZ-AVI/fosfomycin, CAZ-AVI/ciprofloxacin, CAZ-AVI/colistin/aminoglycoside, CAZ-AVI/tigecycline/fosfomycin | 28-day mortality |
| Tofas 2016 | 2010.1-2014.5 | NR | 40(100) | NR | NR | sepsis, severe sepsis, septic shock | NR | treatment with one in vitro active agent | treatment with two or more in vitro active agents | 14-day mortality |
| Porwal 2014 | 2011.5-2012.5 | NR | NR | DM, CKD, post liver transplant, other surgeries | 41(100) | NR | NR | colistin | colistin/meropenem/tigecycline, colistin/meropenem/tigecycline/sulbactam | 30-day mortality |
| Zhou 2021 | 2019.1-2019.12 | NR | 182(87.5) | NR | NR | CCI | NR | tigecycline, carbapenem, amikacin, polymyxin B, CAZ-AVI | tigecycline/polymyxin B, tigecycline/carbapenem, tigecycline/amikacin, CAZ-AVI/imipenem, tigecycline/polymyxin B/imipenem, tigecycline/polymyxin B/amikacin, tigecycline/carbapenem/amikacin, tigecycline/CAZ-AVI, imipenem/amikacin | 30-day mortality |
| Tsai 2021 | 2010-2016 | 70.50 | NR | DM, CKD, malignancy, liver cirrhosis | NR | PBS | 15.5 | the use of at least one drug with in vitro activity against the blood isolates | the use of at least one or more drugs with in vitro activity against the blood isolates | 30-day mortality, clinical failure, microbiological failure |
| Liang 2017 | 2010-2015 | NR | NR | NR | 226(100) | APACHE II score, mechanical ventilation, vasopressor use | NR | tigecycline, colistin | tigecycline with colistin, colistin combination, colistin monotherapy | ICU-mortality |
| Chusri 2019 | 2012.1-2017.12 | NR | NR | NR | 16(57) | APACHE II score | NR | tigecycline | tigecycline/colistin | 14-day/30-day /in-hospital mortality, length of hospital-stay/ventilator-day/ICU-stay |
| Tumbarello 2018 | 2016.4.1-2017.12.31 | 66.00 | 185(88.9) | COPD, CAD, CVD, Solid tumor, Hematologic malignancy, Liver disease, SOT, CKD, Diabetes, Neutropenia | 66(32) | Septic shock, PBS | NR | CAZ-AVI, another agent | combinations that included CAZ-AVI, combinations that did not include CAZ-AVI | 30-day mortality |
| Shields 2017 | 2009.1-2017.2 | NR | NR | NR | NR | PBS, APACHE II score | NR | CAZ-AVI | CAZ-AVI and gentamicin | 30-day mortality, clinical success |
| Madeline 2017 | 2015.3-2016.4 | 60.00 | NR | severe renal disease, severe liver disease, SOT | 35(59) | CCI, PBS | NR | CAZ-AVI | CAZ-AVI with other drugs | in-hospital mortality, microbiological cure, clinical success |
| Cristina 2018 | 2014.10-2016.12 | 58.85 | 20(83.3) | DM, CVD, liver cirrhosis, CKD, chronic pulmonary disease, solid organ/haematological cancer, HIV, immunosuppressive treatment, SOT | 8(33) | CCI, McCabe prognosis of underlying disease, SOFA score | NR | CAZ-AVI | CAZ-AVI with colistin/amikacin/colistin or two of these drugs | 90-day mortality, clinical success |
| Daikos 2014 | 2009.8-2010.12 | 61.73 | NR | NR | 101(58) | NR | NR | tigecycline, colistin, aminoglycoside, carbapenem, other | carbapenem/tigecycline/aminoglycoside or colistin, carbapenem/tigecycline, carbapenem/aminoglycoside, carbapenem/colistin, tigecycline/aminoglycoside/colistin/tigecycline/aminoglycoside, tigecycline/Colistin, aminoglycoside/colistin, Others | 28-day mortality |
| G.Padilla 2019 | 2012.6-2013.2 | NR | NR | NR | NR | NR | NR | tigecycline, gentamicin | Tigecycline/gentamicin | 30-day mortality |
| Shields 2016 | 2010.2-2014.9 | 59.00 | NR | NR | NR | NR | NR | aminoglycosides | aminoglycosides with others | 14-day mortality, 30-day mortality |
| D.Mangoni 2013 | 2008-2011 | 62.00 | NR | CHF, CKD, undergoing dialysis, DM, ischemic heart disease, COPD, CVD, obesity, malignancy | 127(61) | NR | NR | colistin | colistin and rifampicin | 30-day overall/ infection-related mortality, hospitalization length, microbiological eradication |

BSI = Bloodstream infection (bacteremia); CAD =Coronary Artery Disease; CHF = Congestive heart failure; CRF = Chronic renal failure; CR-Kp = Carbapenem resistant Klebsiella pneumoniae; DM = Diabetes mellitus; ESLD = End-stage liver disease; F = Female; HIV = Human immunodeficiency virus; IAI = Intra-abdominal infection; IAA = intra-abdominal abscess; RTI=respiratory tract infection; M = Male; MIC = Minimum inhibitory concentration;

OM= Osteomyelitis; PNA = Pneumonia; Pt = Patient; TDC = Tunneled dialysis catheter; WT = Wild-type;

DM=diabetes mellitus; CRF=chronic renal failure; COPD= chronic obstructive pulmonary disease; CKD=, SOT

CVD=cardiovascular disease;

CCI=Charlson Comorbidity Index

OST, HSCT, CRF

eTable 4. MINORS items for non-randomized studies

| Author, year | A clearly stated aim | Inclusion of consecutive patients | Prospective collection of data | Endpoints appropriate to the aim of the study | Unbiased assessment of the study endpoint | Follow-up period appropriate to the aim of the study | Loss to follow up less than 5% | Prospective calculation of the study size | An adequate control group | Contemporary groups | Baseline equivalence of groups | Adequate statistical analyses | Study quality score |
| --- | --- | --- | --- | --- | --- | --- | --- | --- | --- | --- | --- | --- | --- |
| Lee 2020 | 2 | 2 | 1 | 2 | 2 | 2 | 0 | 0 | 2 | 2 | 2 | 2 | 17 |
| Qureshi 2012 | 2 | 2 | 1 | 1 | 2 | 2 | 0 | 0 | 1 | 2 | 1 | 2 | 14 |
| Oliveira 2014 | 2 | 2 | 2 | 2 | 0 | 2 | 0 | 0 | 2 | 2 | 2 | 2 | 18 |
| Park 2019 | 2 | 2 | 2 | 2 | 0 | 2 | 0 | 0 | 2 | 2 | 2 | 2 | 18 |
| Freire 2019 | 2 | 2 | 1 | 2 | 0 | 2 | 0 | 0 | 1 | 1 | 0 | 1 | 12 |
| Tuon 2016 | 2 | 2 | 1 | 2 | 0 | 2 | 0 | 0 | 2 | 2 | 1 | 2 | 16 |
| Wang 2018 | 2 | 2 | 2 | 2 | 1 | 2 | 0 | 0 | 2 | 2 | 0 | 2 | 17 |
| Önal 2019 | 1 | 2 | 1 | 2 | 0 | 2 | 0 | 0 | 2 | 2 | 0 | 1 | 13 |
| LIAO 2015 | 2 | 2 | 1 | 2 | 0 | 2 | 0 | 0 | 2 | 2 | 0 | 2 | 15 |
| Tan 2020 | 1 | 2 | 2 | 2 | 0 | 2 | 0 | 0 | 2 | 2 | 2 | 2 | 17 |
| Abdelsalam 2018 | 2 | 2 | 2 | 2 | 0 | 2 | 0 | 0 | 2 | 1 | 2 | 2 | 17 |
| Claudia 2016 | 2 | 2 | 1 | 2 | 2 | 2 | 0 | 0 | 2 | 2 | 0 | 2 | 19 |
| P.Nadales 2019 | 2 | 2 | 1 | 1 | 2 | 2 | 0 | 0 | 2 | 2 | 0 | 2 | 16 |
| Wang 2016 | 2 | 2 | 1 | 2 | 2 | 2 | 0 | 0 | 2 | 2 | 0 | 2 | 17 |
| Tumbarello 2012 | 2 | 2 | 0 | 2 | 2 | 2 | 1 | 0 | 2 | 2 | 0 | 2 | 17 |
| RIHANI 2012 | 2 | 2 | 1 | 2 | 1 | 2 | 0 | 0 | 2 | 2 | 0 | 2 | 16 |
| Machuca 2017 | 2 | 2 | 1 | 2 | 1 | 2 | 1 | 0 | 2 | 2 | 0 | 2 | 19 |
| L.Corte´s 2014 | 2 | 2 | 2 | 2 | 2 | 2 | 1 | 0 | 2 | 2 | 2 | 2 | 21 |
| Ghafur 2017 | 2 | 2 | 2 | 2 | 1 | 2 | 2 | 0 | 2 | 2 | 2 | 0 | 19 |
| Tumbarello 2015 | 2 | 2 | 1 | 2 | 1 | 2 | 0 | 0 | 2 | 2 | 1 | 2 | 17 |
| Capone 2012 | 2 | 2 | 2 | 2 | 1 | 2 | 0 | 0 | 2 | 2 | 0 | 2 | 17 |
| Katip 2020 | 2 | 2 | 2 | 1 | 1 | 2 | 0 | 0 | 2 | 2 | 1 | 2 | 17 |
| G.Gutierrez 2017 | 2 | 2 | 2 | 2 | 2 | 2 | 2 | 0 | 2 | 2 | 2 | 2 | 22 |
| Niu 2019 | 2 | 2 | 1 | 2 | 1 | 2 | 0 | 0 | 2 | 2 | 2 | 2 | 18 |
| Katip 2020* | 2 | 2 | 2 | 2 | 1 | 2 | 1 | 0 | 2 | 2 | 2 | 2 | 20 |
| Amat 2017 | 2 | 2 | 1 | 1 | 2 | 2 | 0 | 0 | 2 | 2 | 1 | 2 | 17 |
| Medeiros 2018 | 2 | 2 | 1 | 2 | 1 | 2 | 0 | 0 | 2 | 2 | 2 | 2 | 18 |
| G.Simmonds 2016 | 2 | 2 | 1 | 1 | 1 | 2 | 0 | 0 | 2 | 2 | 2 | 2 | 17 |
| Shi 2019 | 2 | 2 | 2 | 1 | 1 | 2 | 1 | 0 | 2 | 2 | 2 | 1 | 17 |
| Park 2020 | 2 | 2 | 1 | 1 | 1 | 2 | 0 | 0 | 2 | 2 | 2 | 2 | 17 |
| Yilmaz 2015 | 2 | 1 | 1 | 1 | 1 | 2 | 0 | 0 | 2 | 2 | 2 | 2 | 16 |
| Zhang 2020 | 2 | 2 | 2 | 2 | 1 | 1 | 1 | 0 | 2 | 2 | 1 | 2 | 18 |
| Villegas 2016 | 2 | 2 | 1 | 1 | 1 | 2 | 0 | 0 | 2 | 2 | 0 | 1 | 14 |
| Karaiskos 2020 | 2 | 2 | 1 | 2 | 1 | 2 | 0 | 0 | 2 | 2 | 2 | 2 | 17 |
| Tofas 2016 | 2 | 2 | 1 | 2 | 1 | 1 | 1 | 0 | 2 | 2 | 1 | 2 | 17 |
| Porwal 2014 | 1 | 0 | 1 | 1 | 1 | 2 | 1 | 0 | 1 | 2 | 0 | 2 | 12 |
| Zhou 2021 | 2 | 2 | 2 | 2 | 1 | 2 | 1 | 0 | 2 | 2 | 0 | 2 | 18 |
| Tsai 2021 | 2 | 2 | 1 | 2 | 0 | 2 | 1 | 0 | 2 | 1 | 2 | 2 | 17 |
| Liang 2017 | 2 | 1 | 1 | 1 | 1 | 2 | 1 | 0 | 2 | 1 | 0 | 2 | 14 |
| Chusri 2019 | 2 | 2 | 1 | 2 | 1 | 2 | 1 | 0 | 2 | 2 | 1 | 2 | 18 |
| Tumbarello 2018 | 2 | 2 | 0 | 1 | 1 | 2 | 1 | 0 | 1 | 2 | 1 | 2 | 15 |
| Shields 2017 | 2 | 2 | 2 | 1 | 1 | 1 | 1 | 0 | 2 | 2 | 1 | 2 | 17 |
| Madeline 2017 | 2 | 2 | 1 | 1 | 1 | 1 | 1 | 0 | 2 | 2 | 1 | 2 | 16 |
| Cristina 2018 | 2 | 0 | 1 | 1 | 1 | 1 | 0 | 0 | 2 | 2 | 1 | 2 | 13 |
| Daikos 2014 | 2 | 2 | 1 | 1 | 1 | 2 | 1 | 0 | 2 | 2 | 2 | 2 | 18 |
| G.Padilla 2019 | 2 | 1 | 2 | 1 | 1 | 1 | 1 | 0 | 2 | 2 | 1 | 2 | 16 |
| Shields 2016 | 2 | 2 | 1 | 1 | 1 | 2 | 0 | 0 | 2 | 2 | 1 | 2 | 16 |


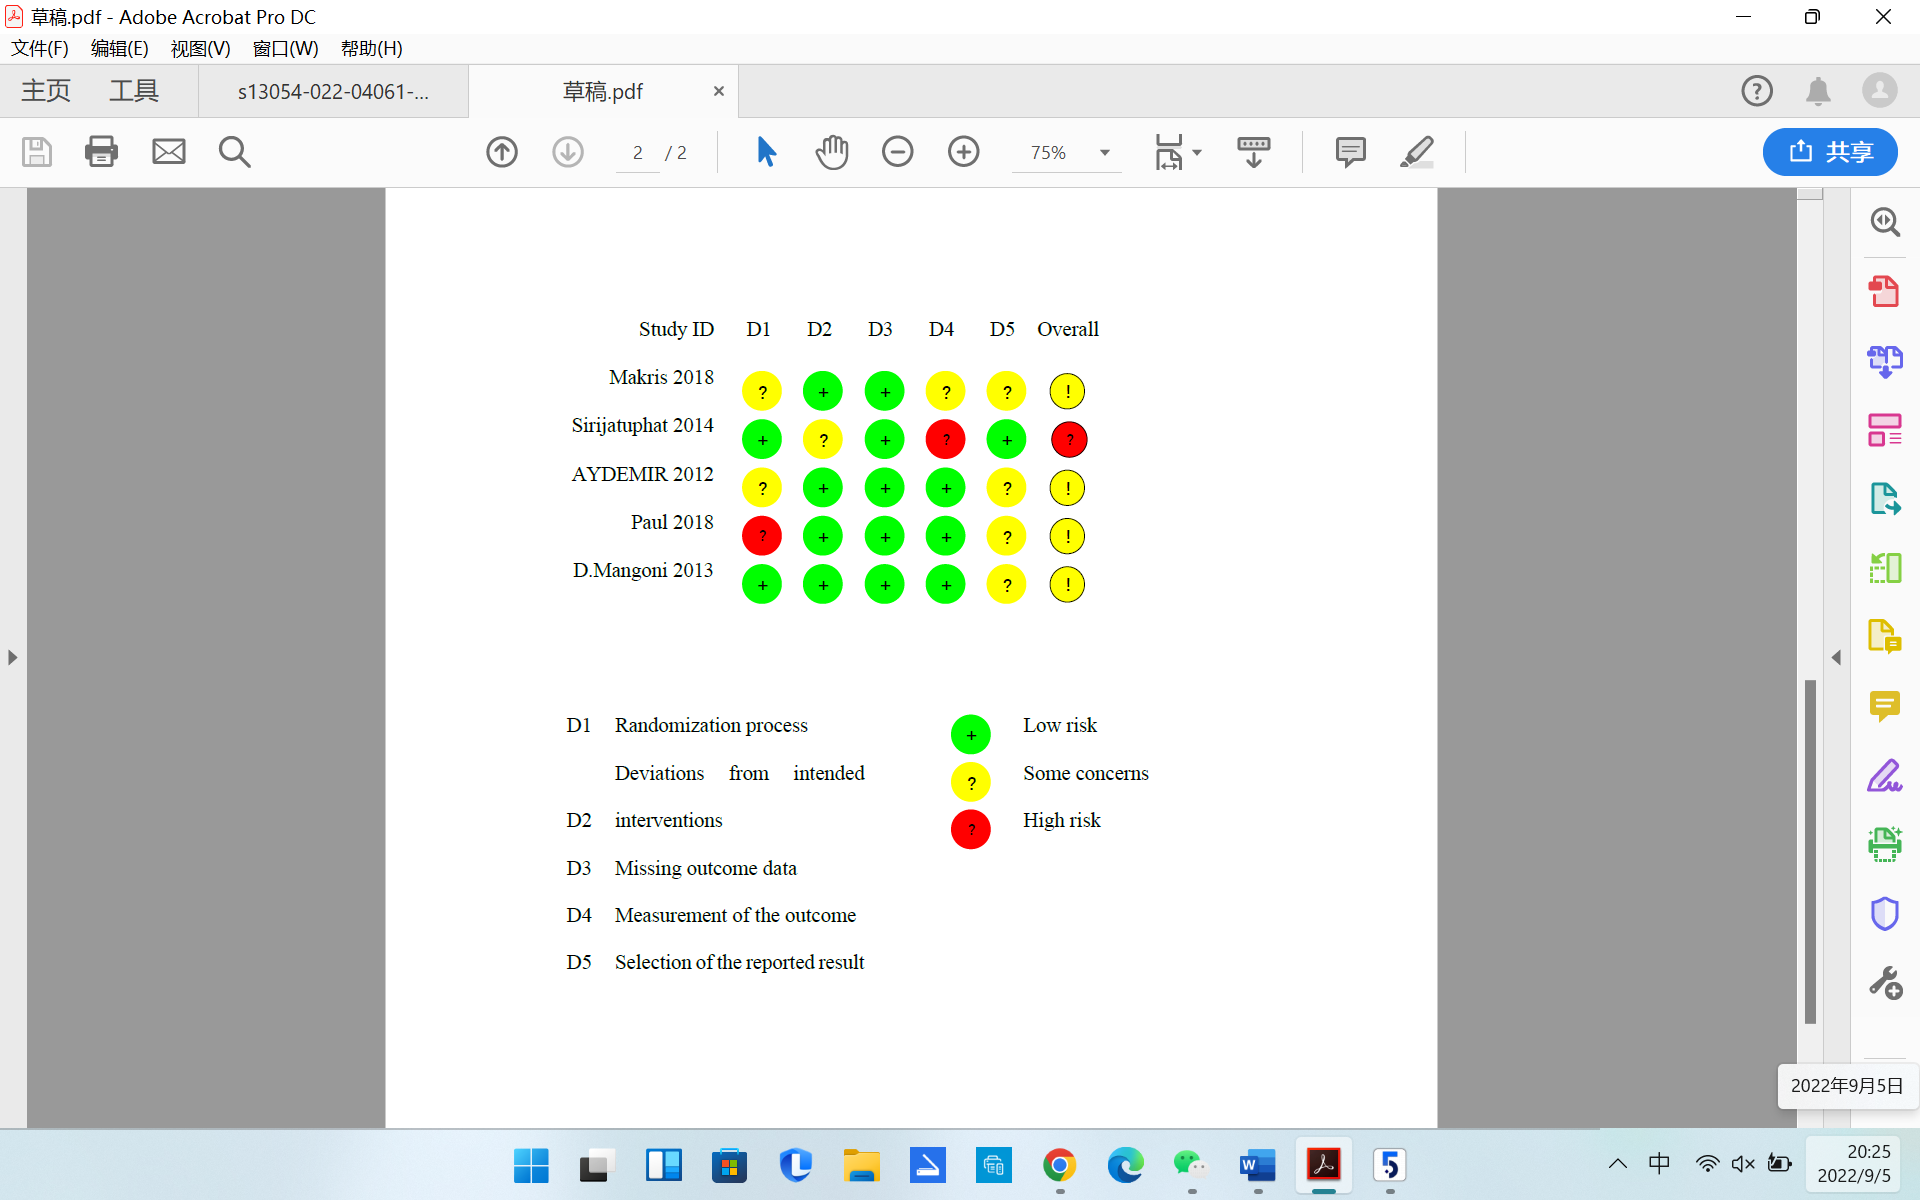


**eFigure1. Bias of 5 RCTs in RoB 2.0**


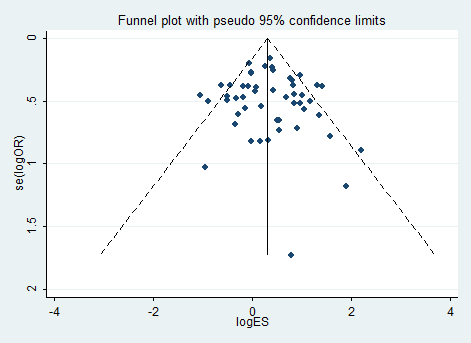


**eFigure2. Funnel plot analysis showed no asymmetry**


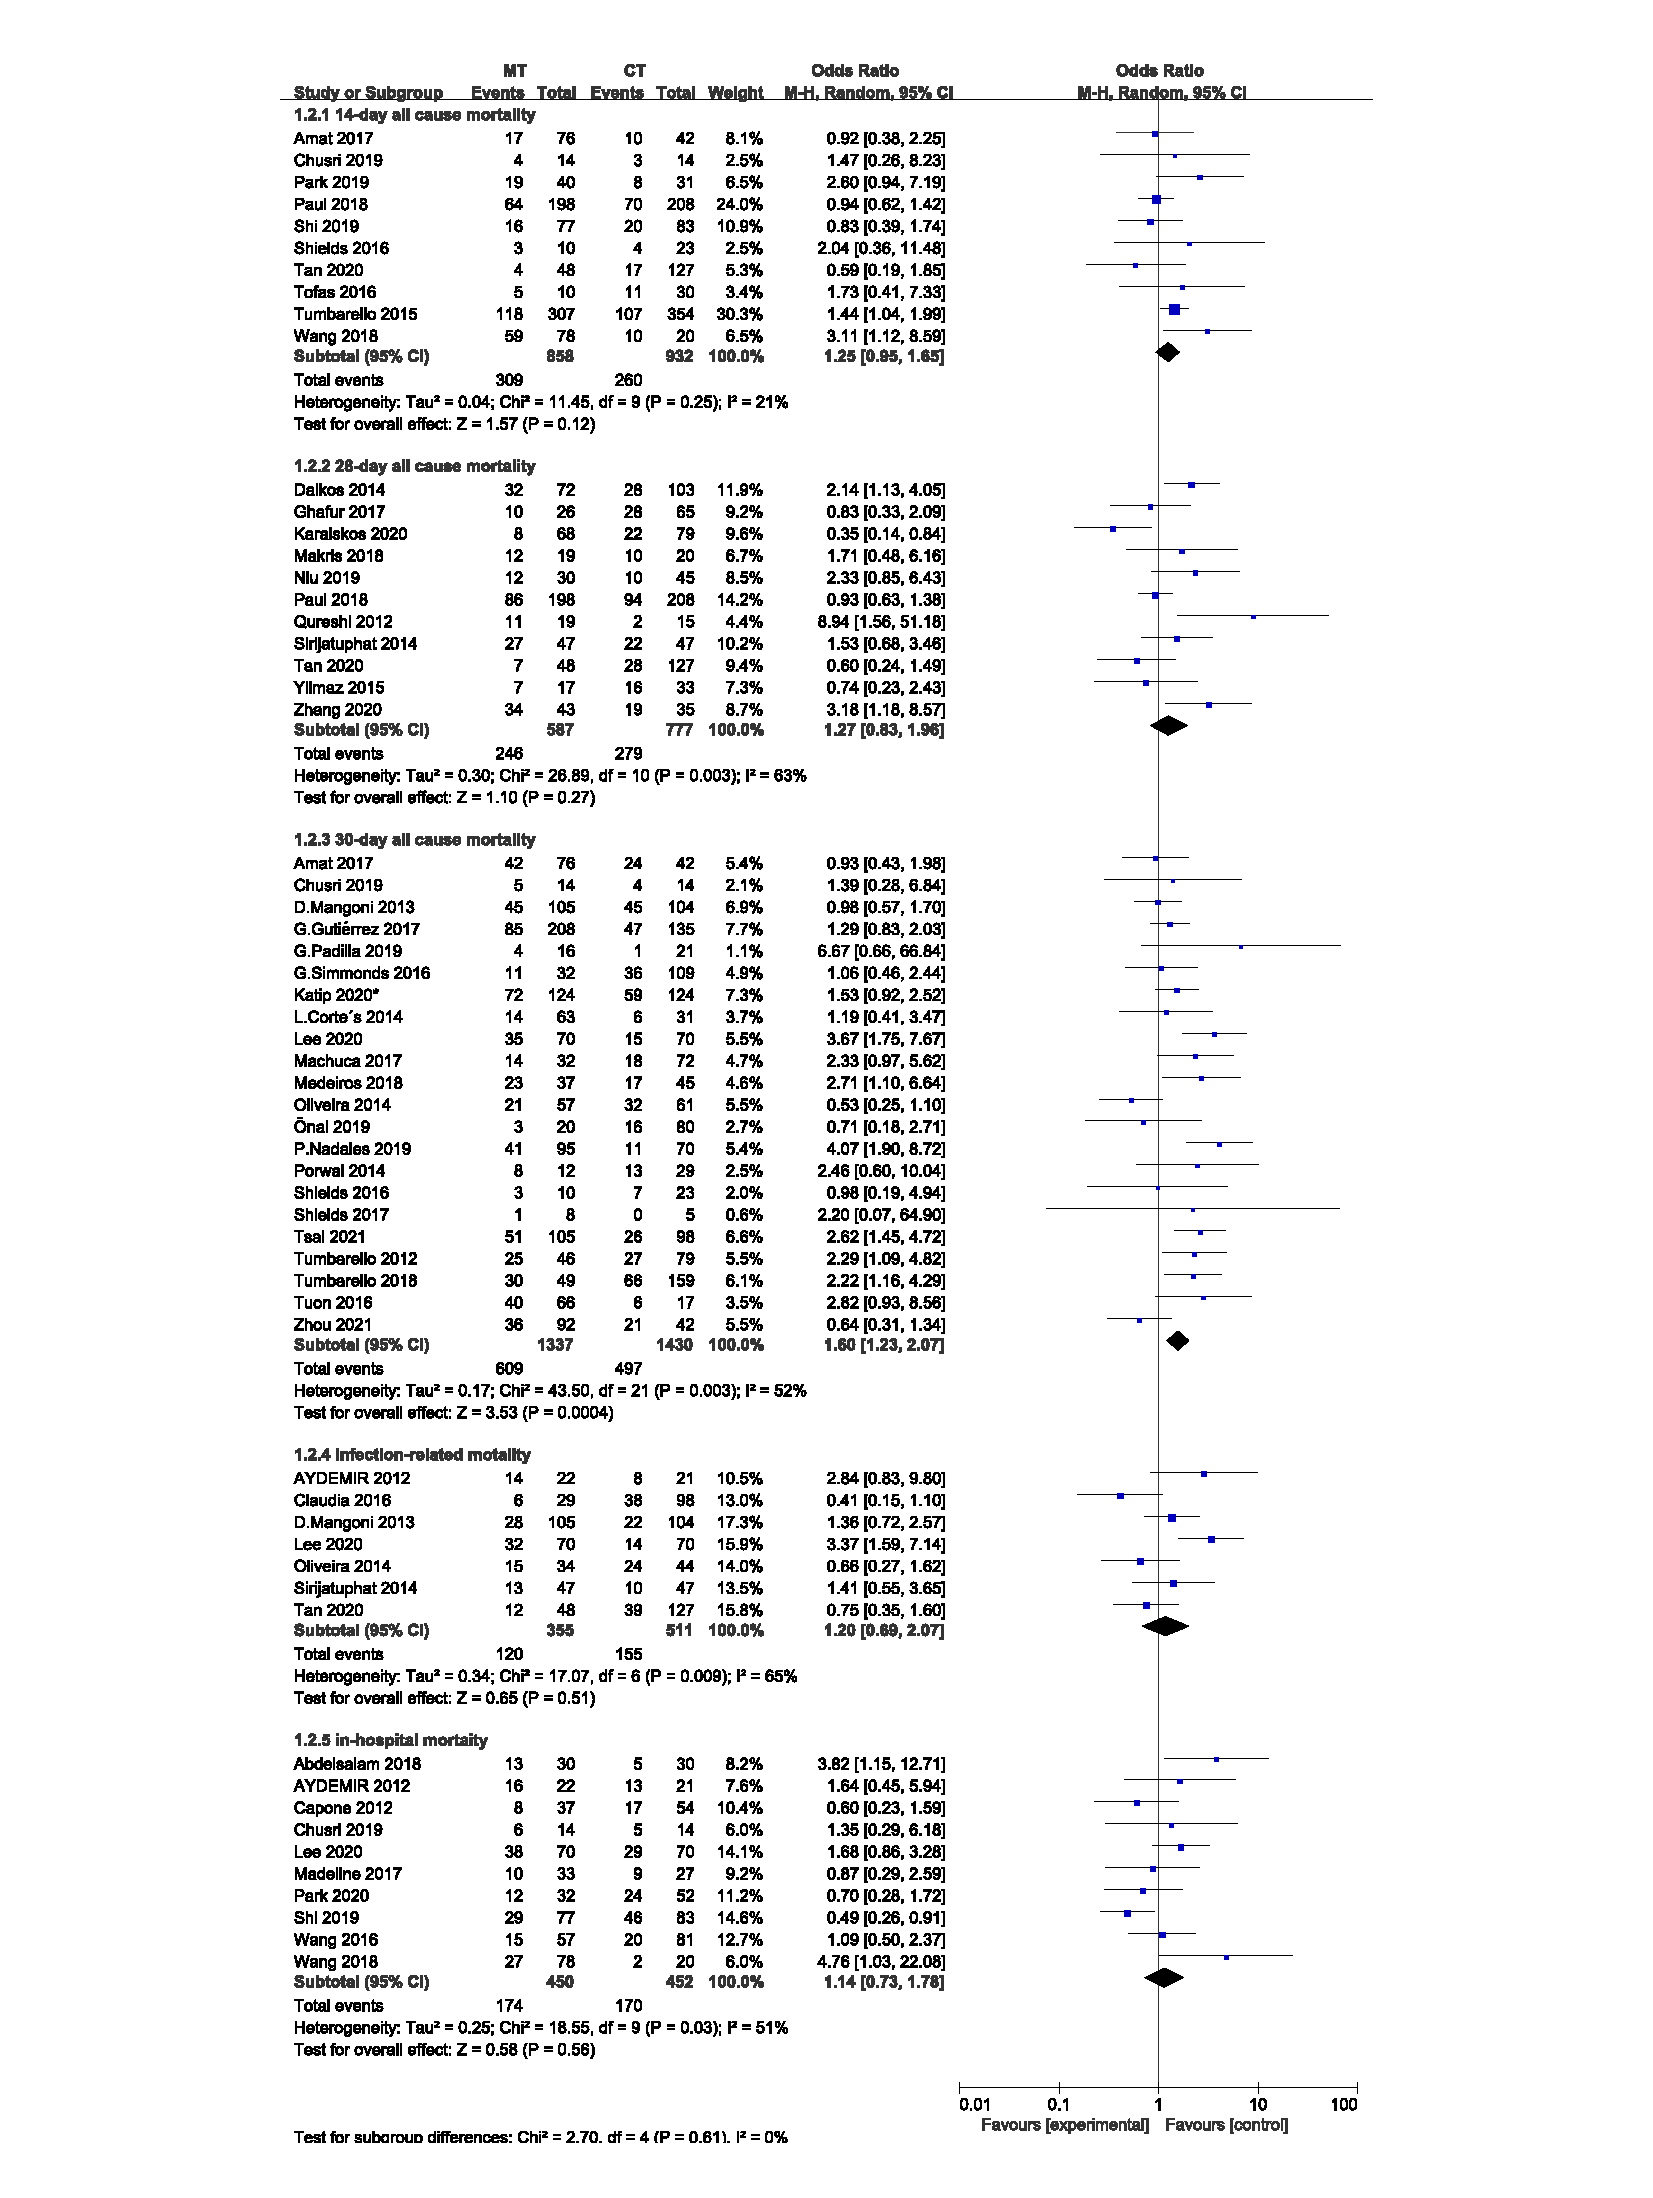


**eFigure3. Subgroup analyses on mortality at the certain time point in the process of treatment**


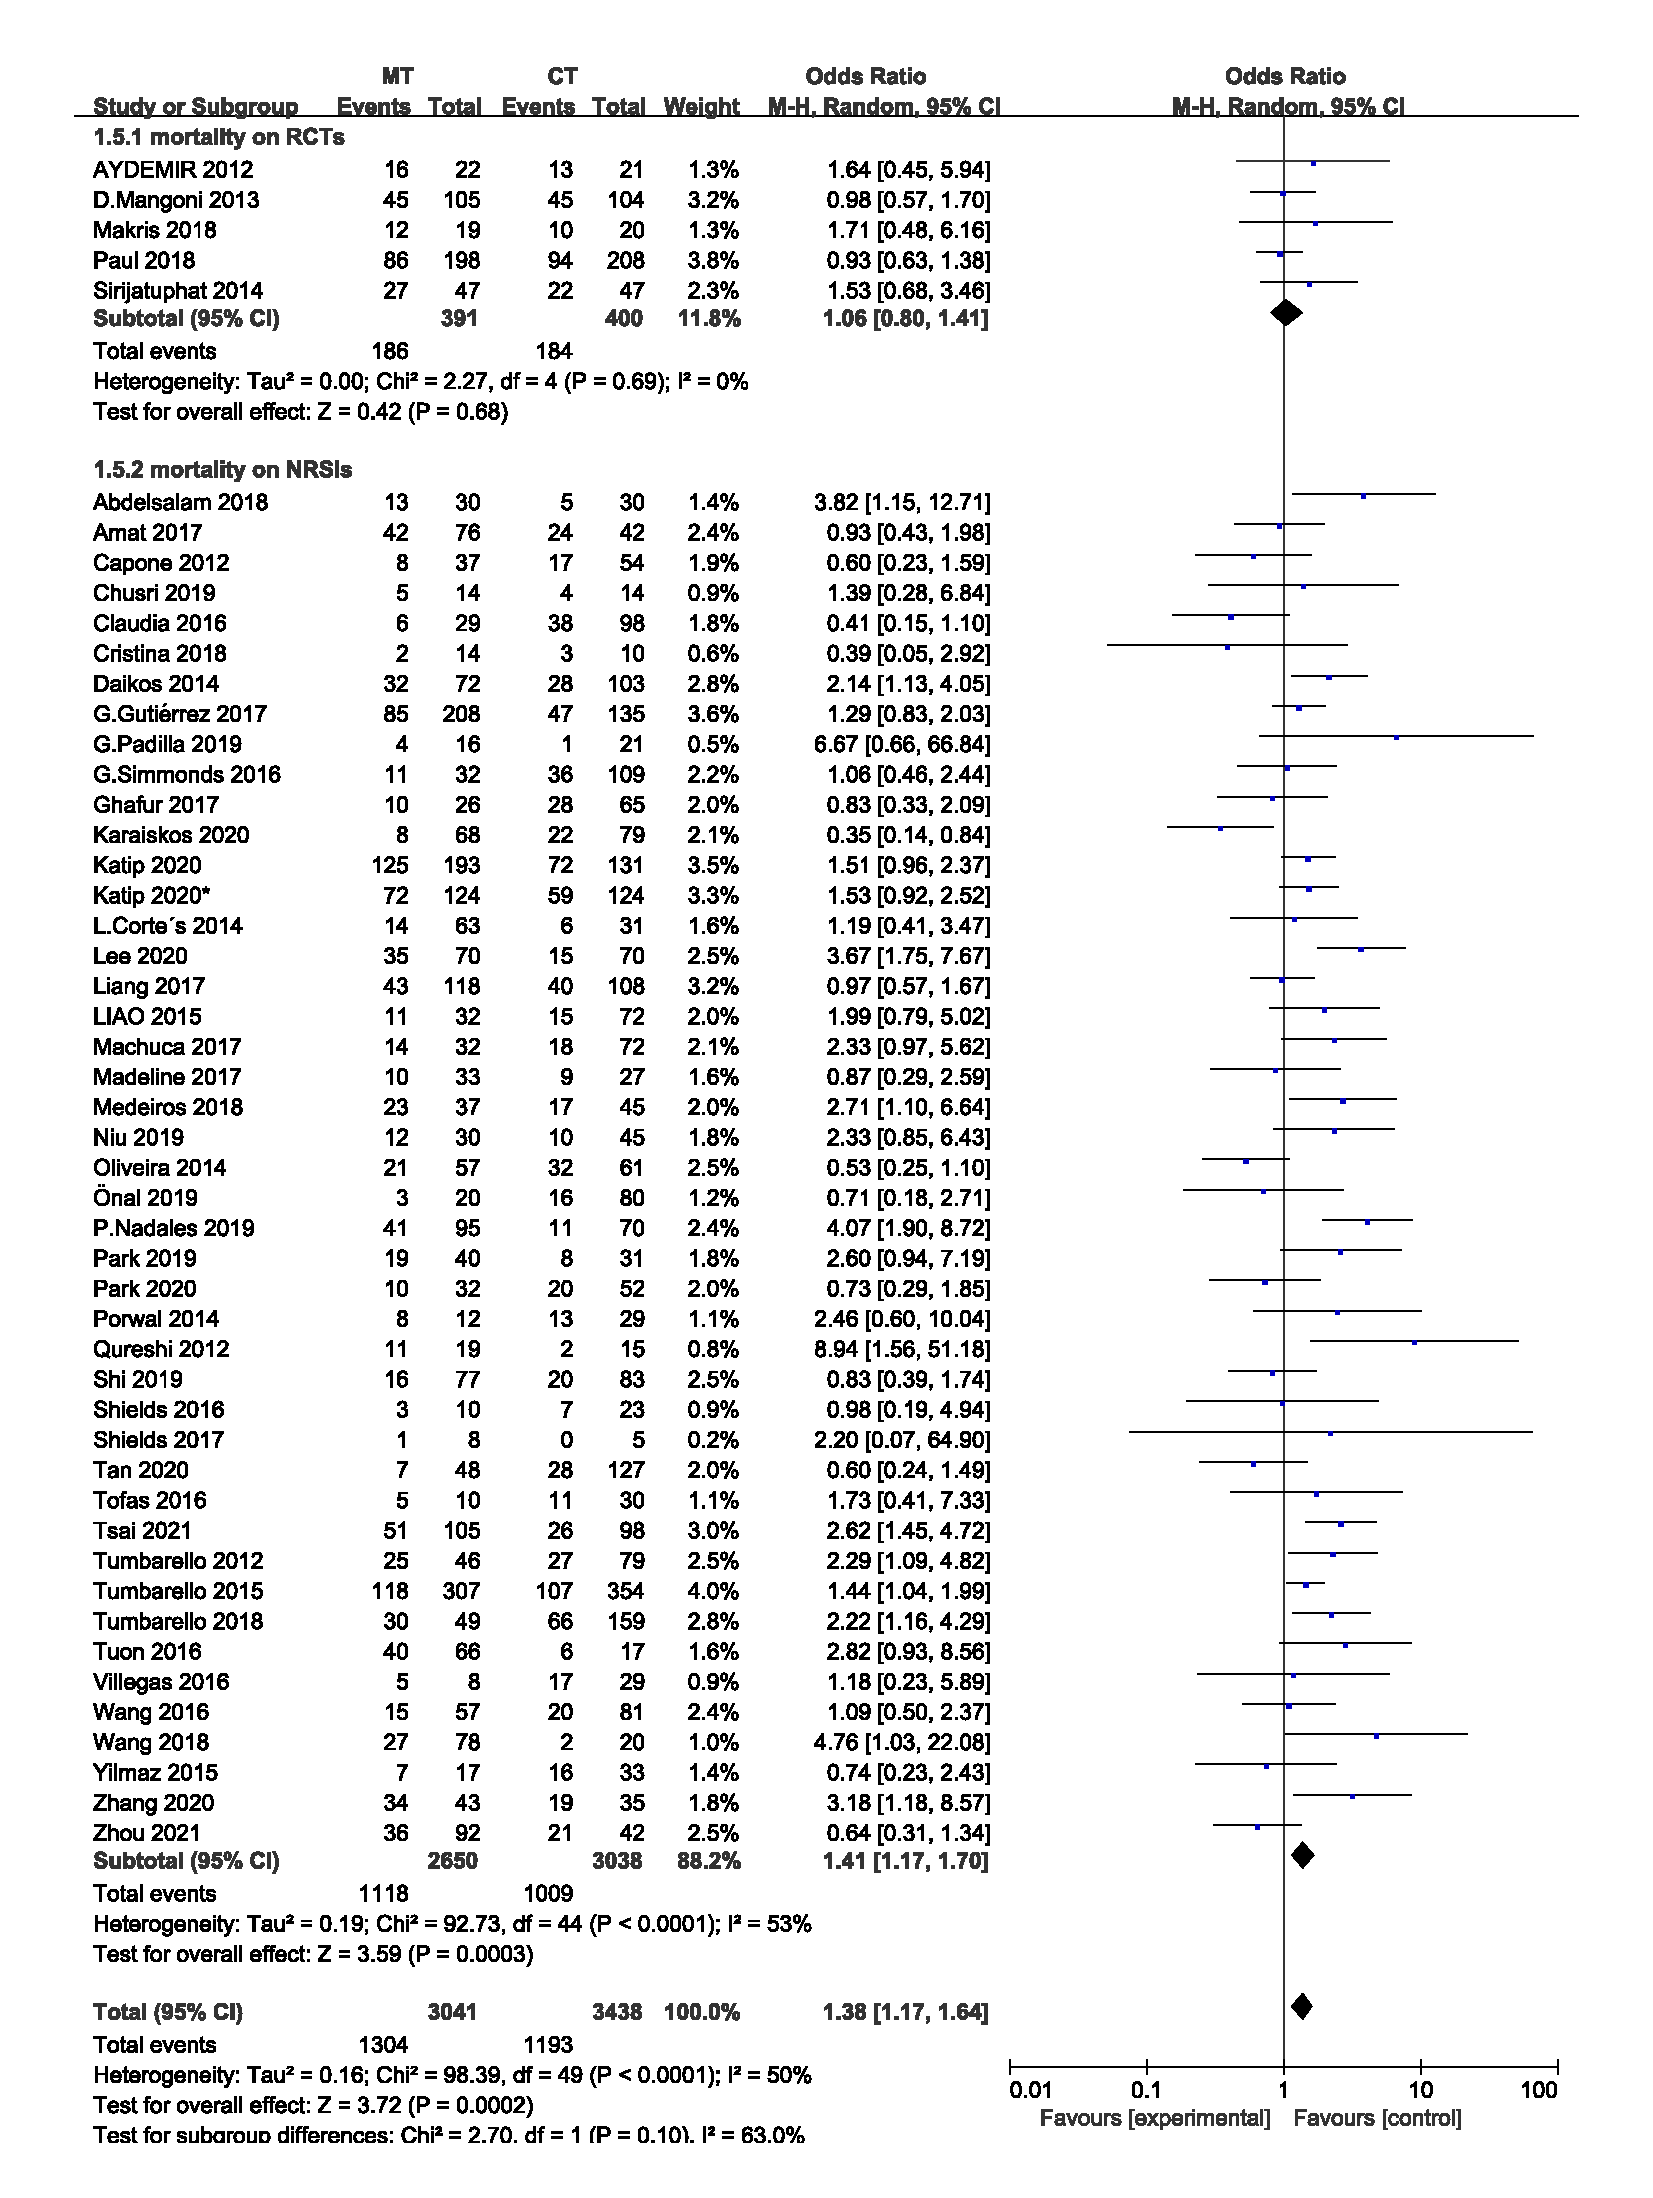


**eFigure4. Subgroup analyses on mortality according to study design**


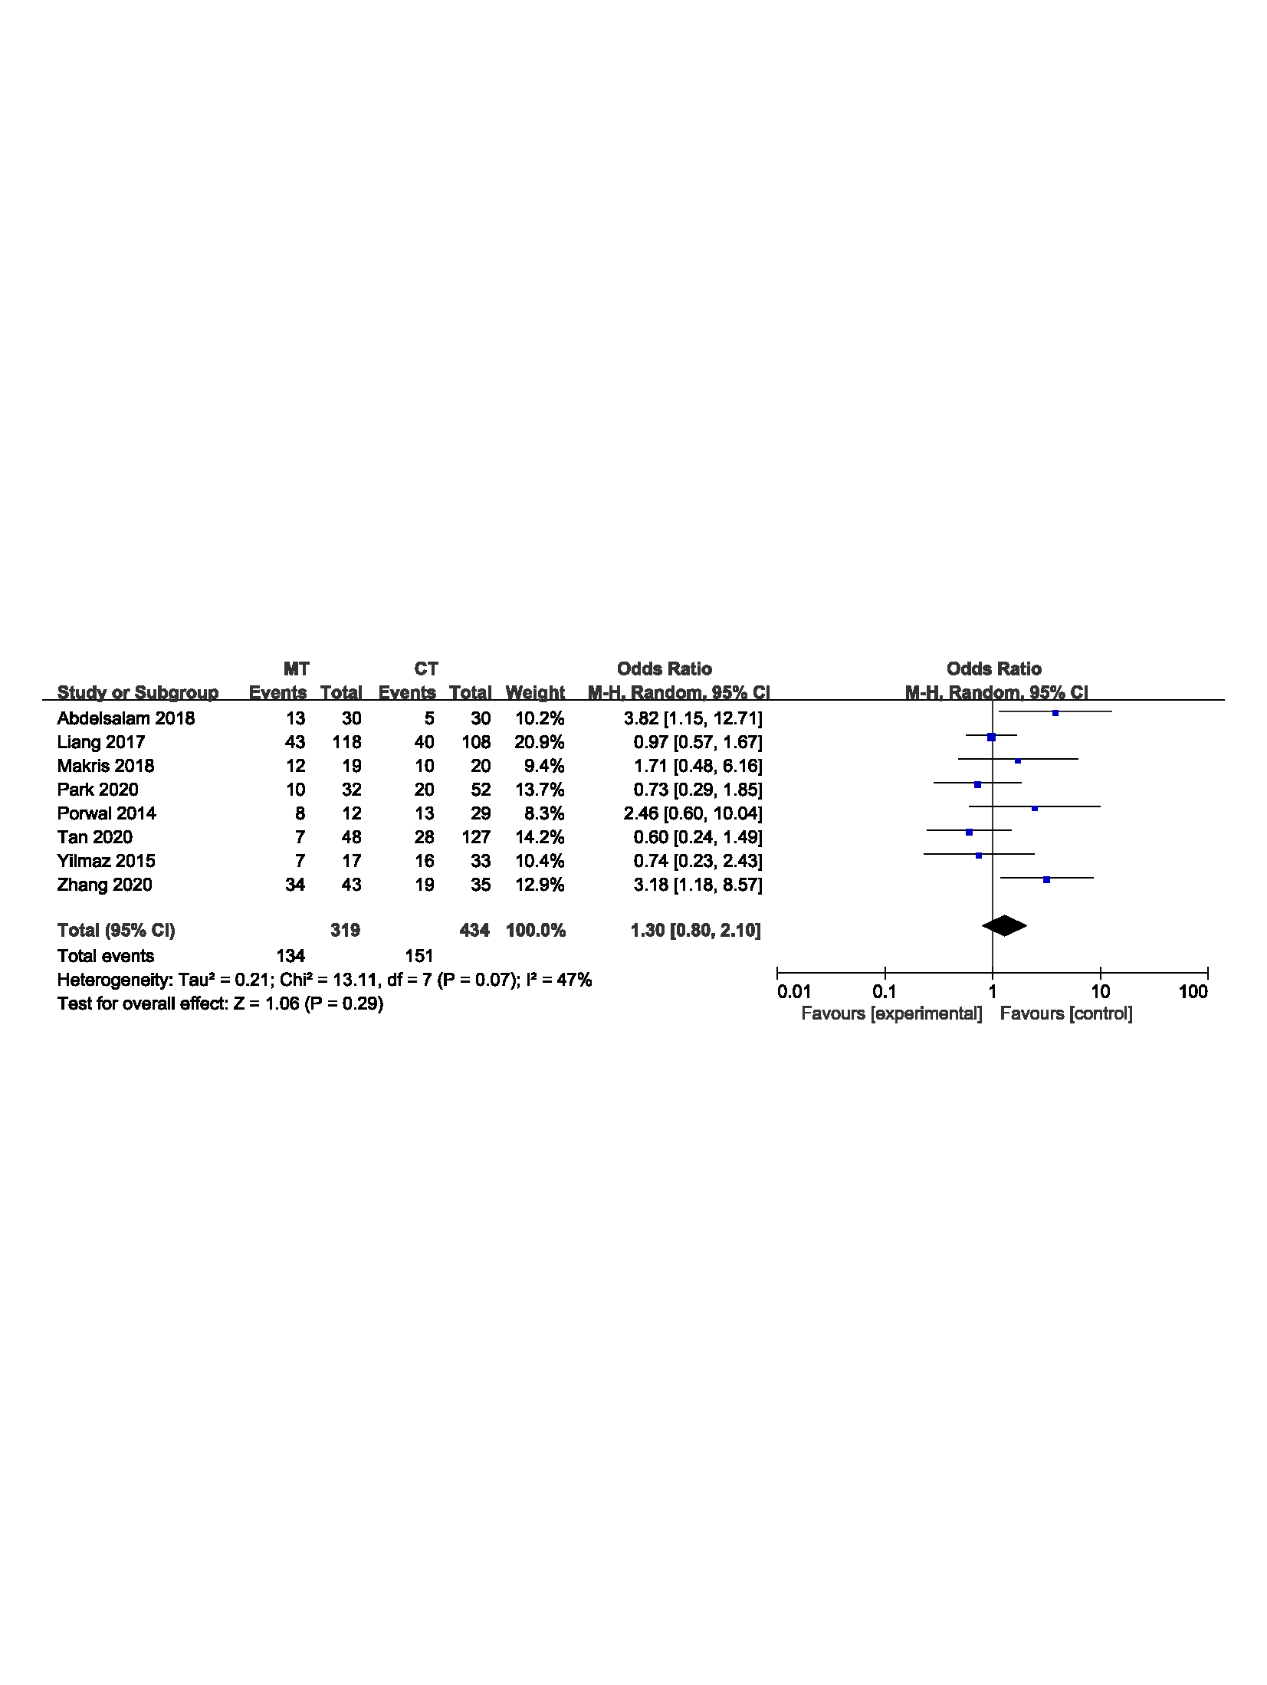


**eFigure5. Comparison patients admitted to the ICU of mortality between combination therapy and monotherapy**


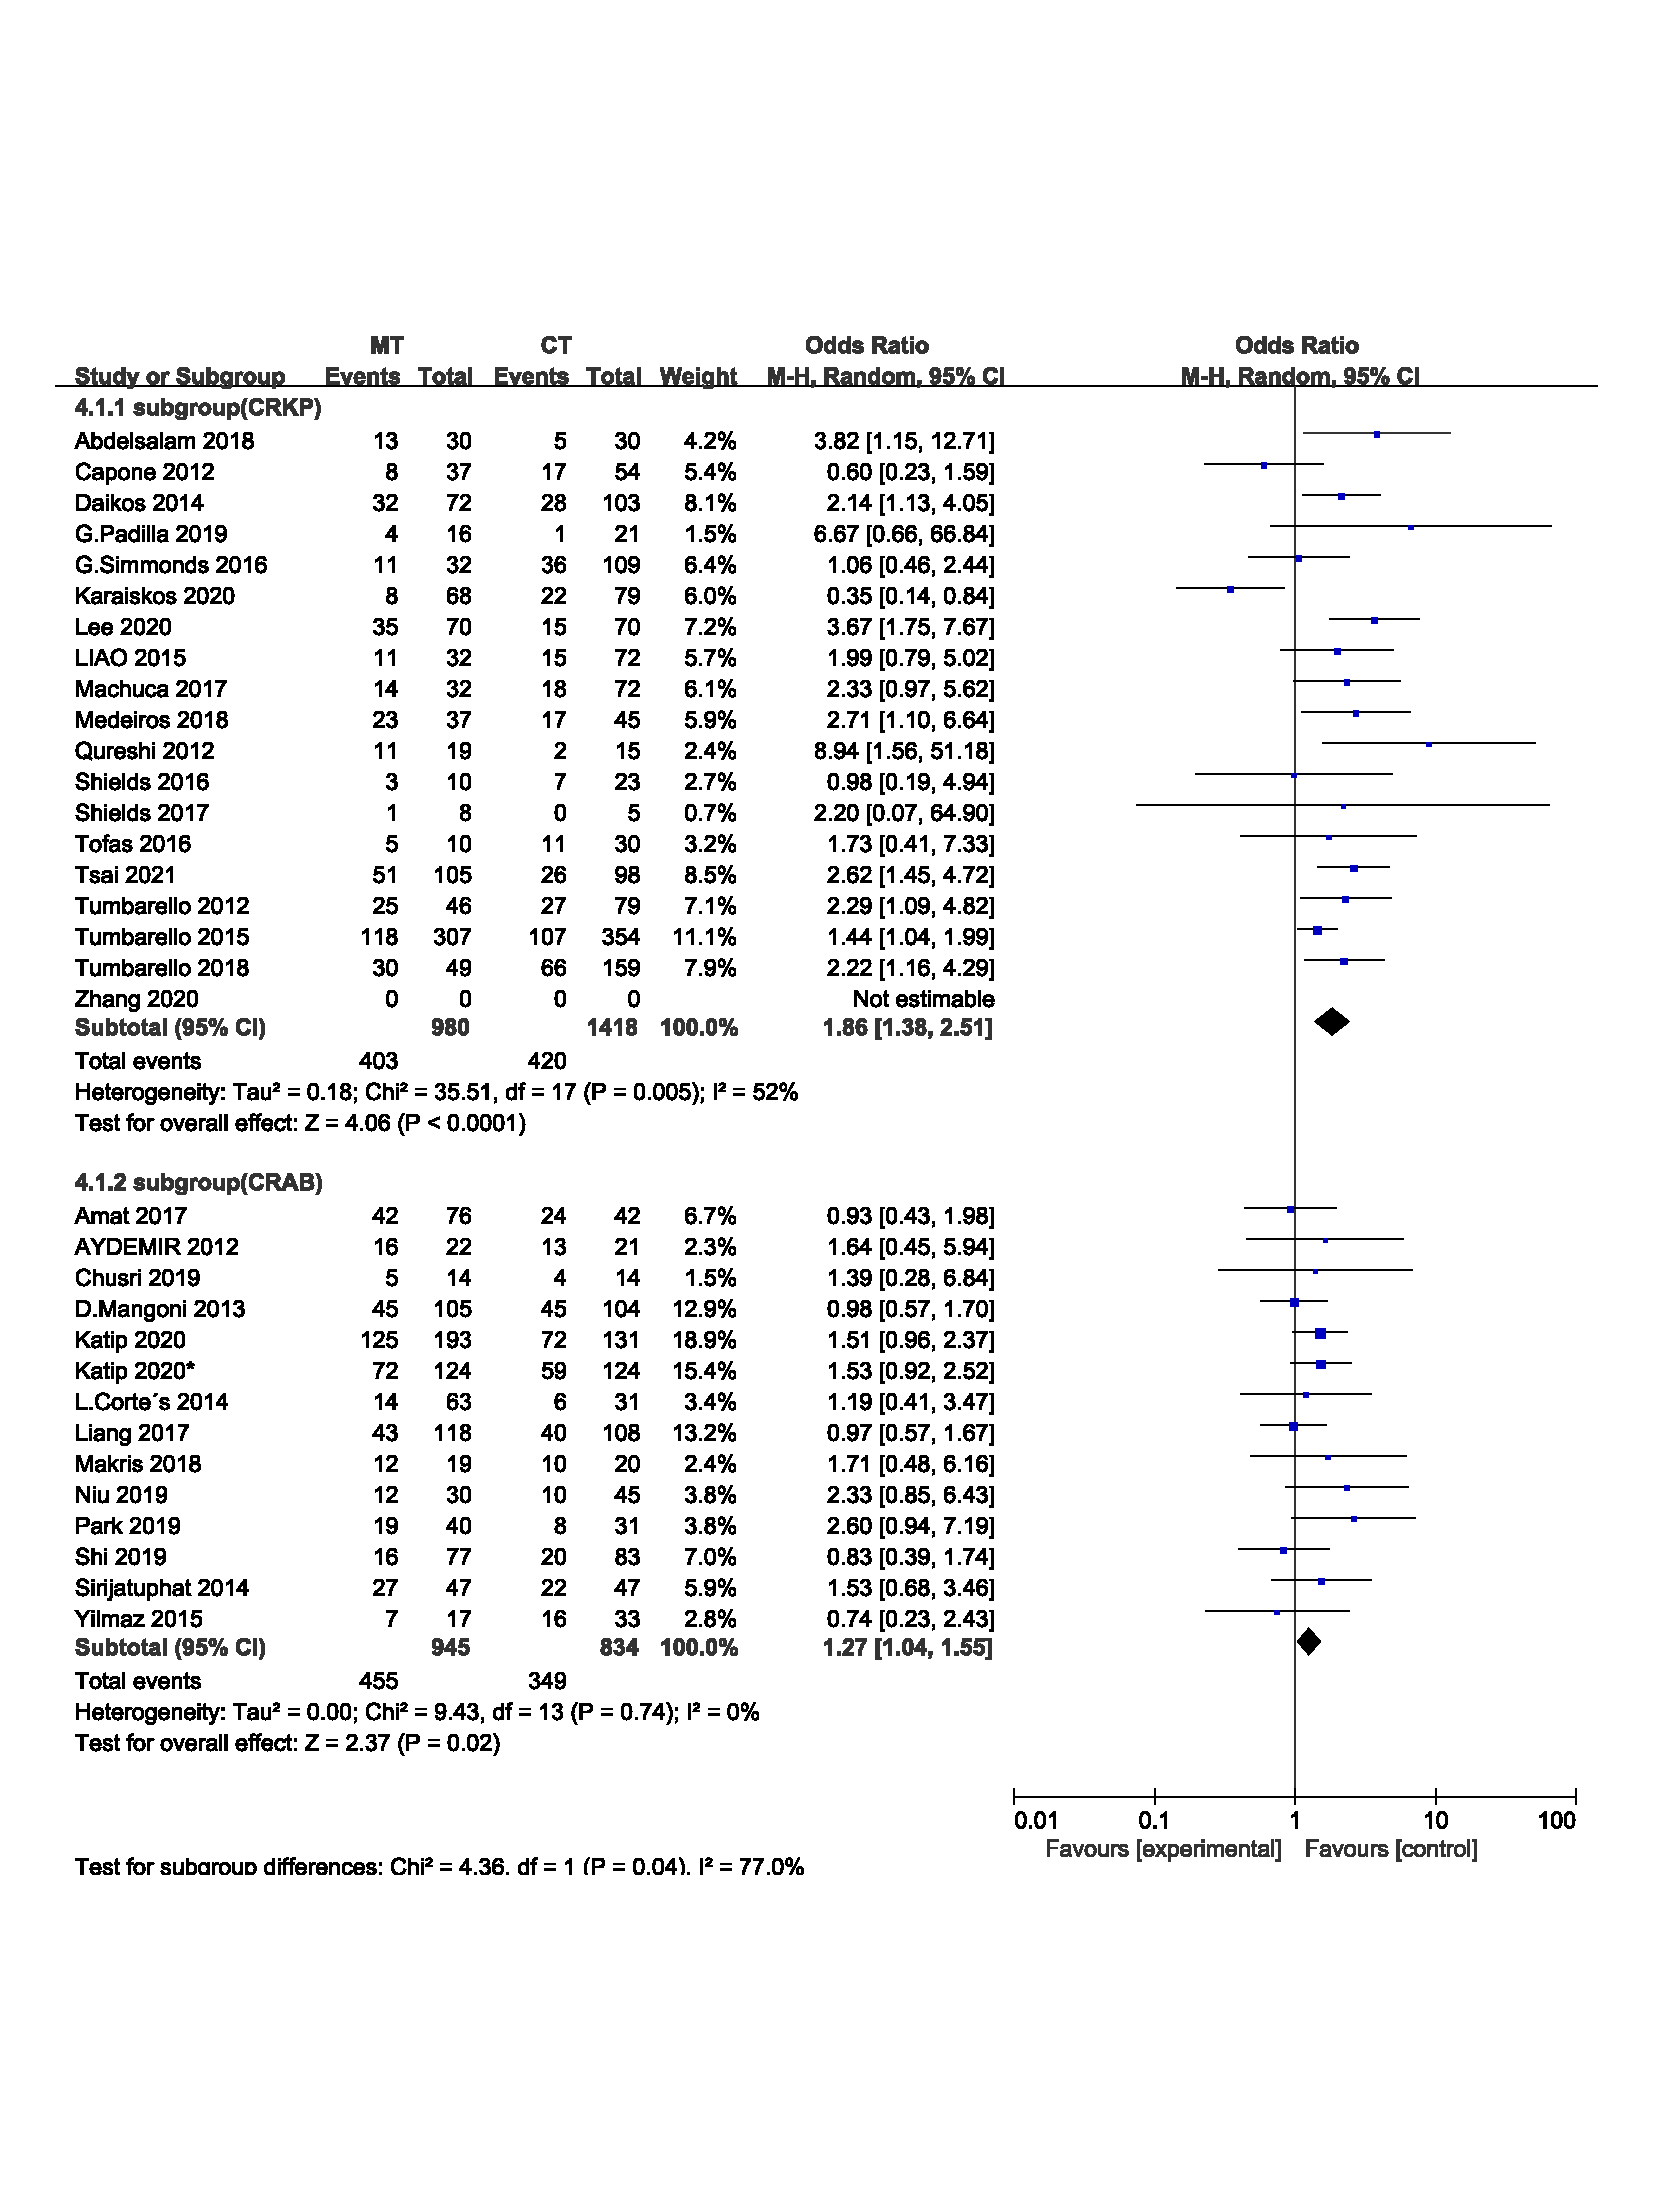


**eFigure 6. Subgroup analyses forest plot regarding specific organism were performed**


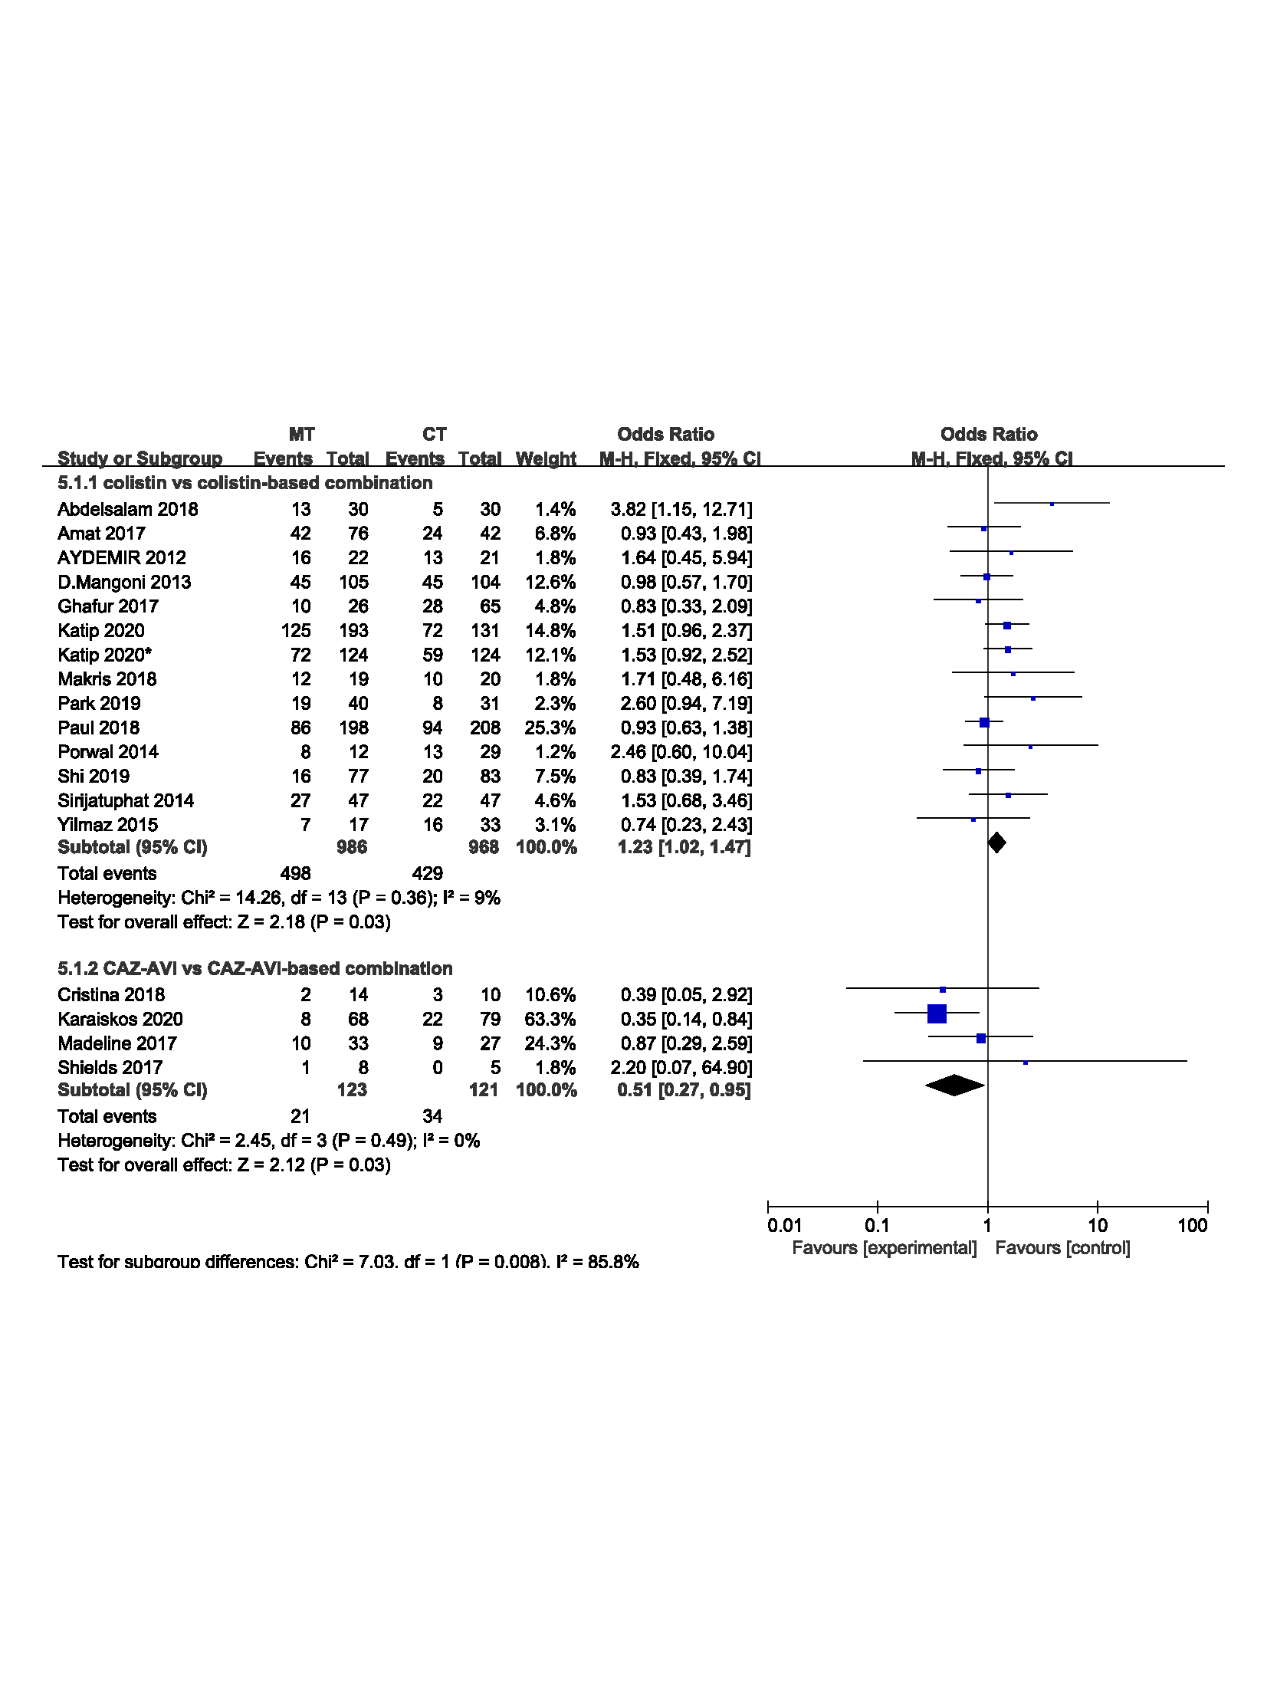


**eFigure 7. Comparison of mortality of colistin-based and CAZ-AVI-based regimens, CAZ-AVI, ceftazidime-avibactam**


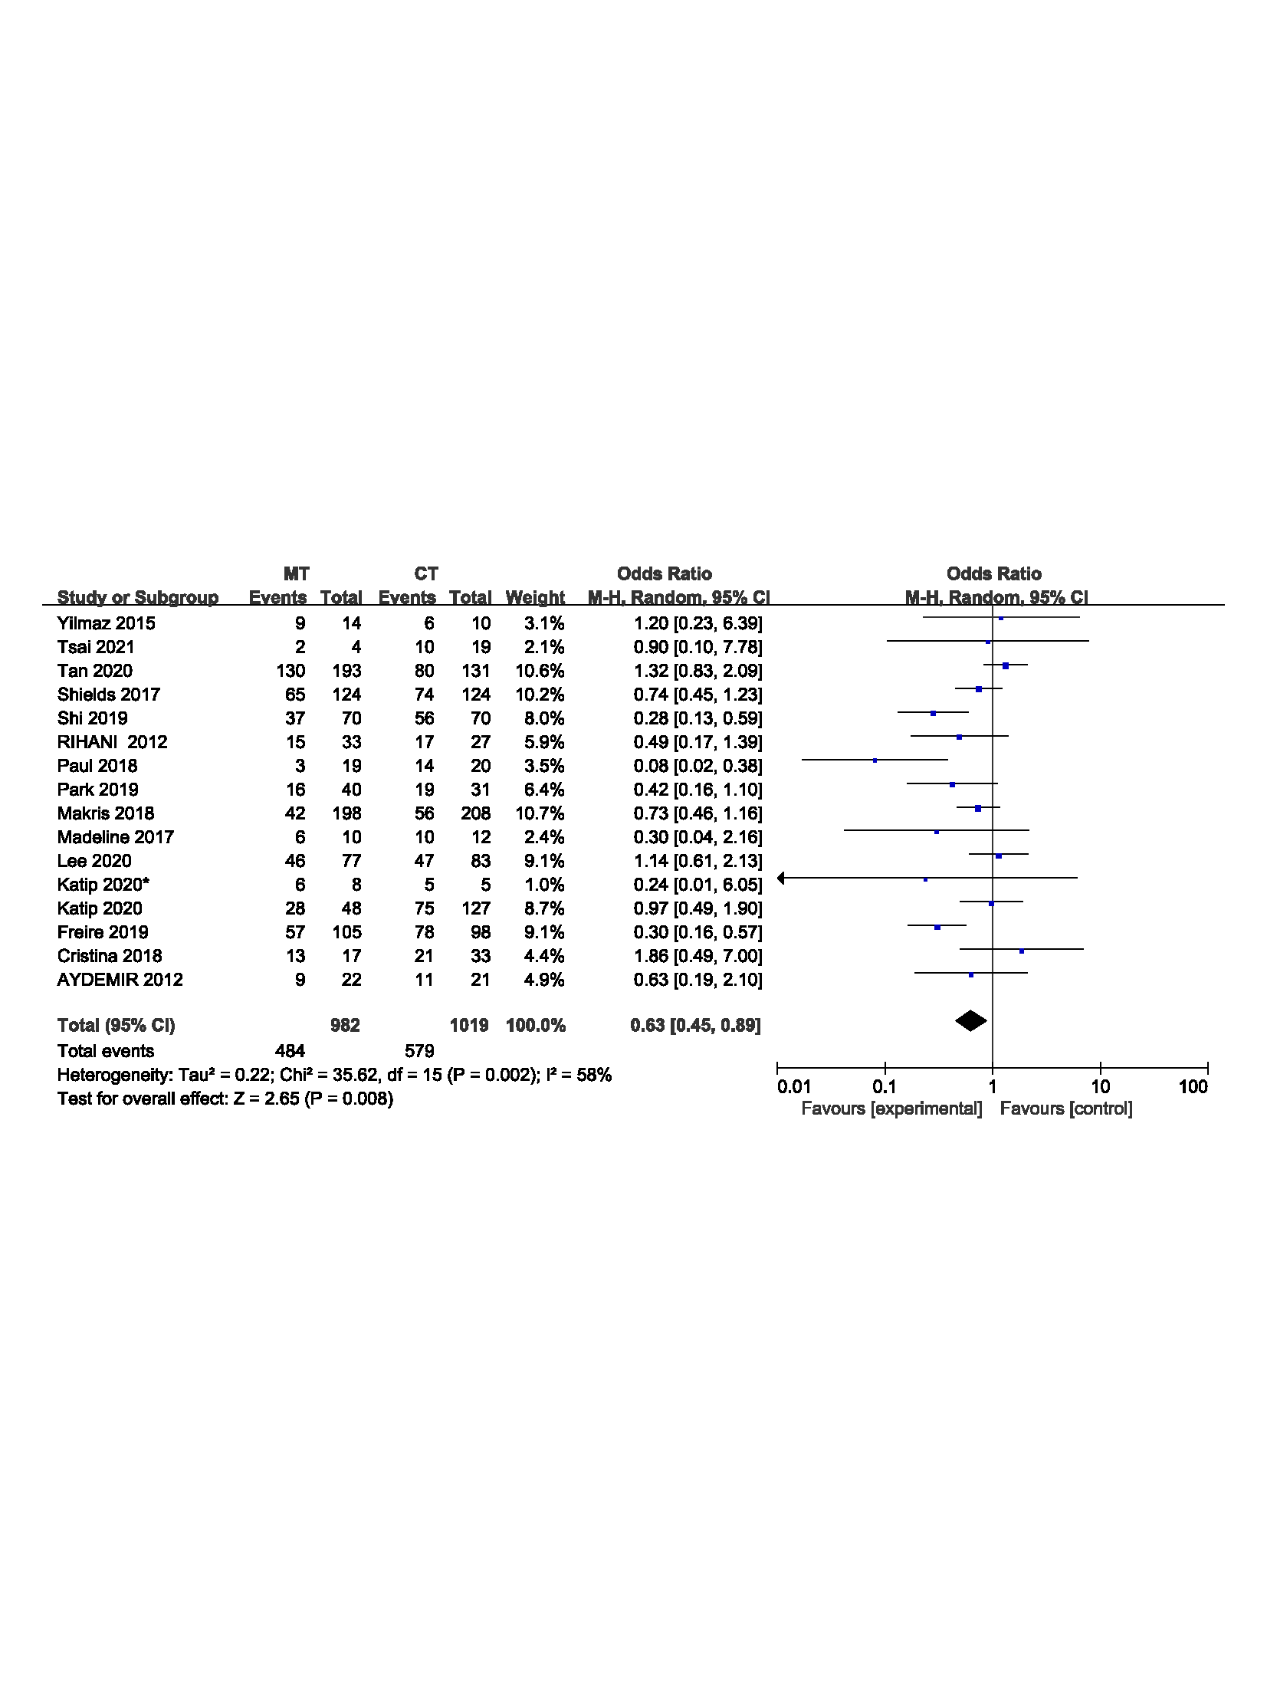


**eFigure 8. Comparison of clinical success for treating CRGNB**


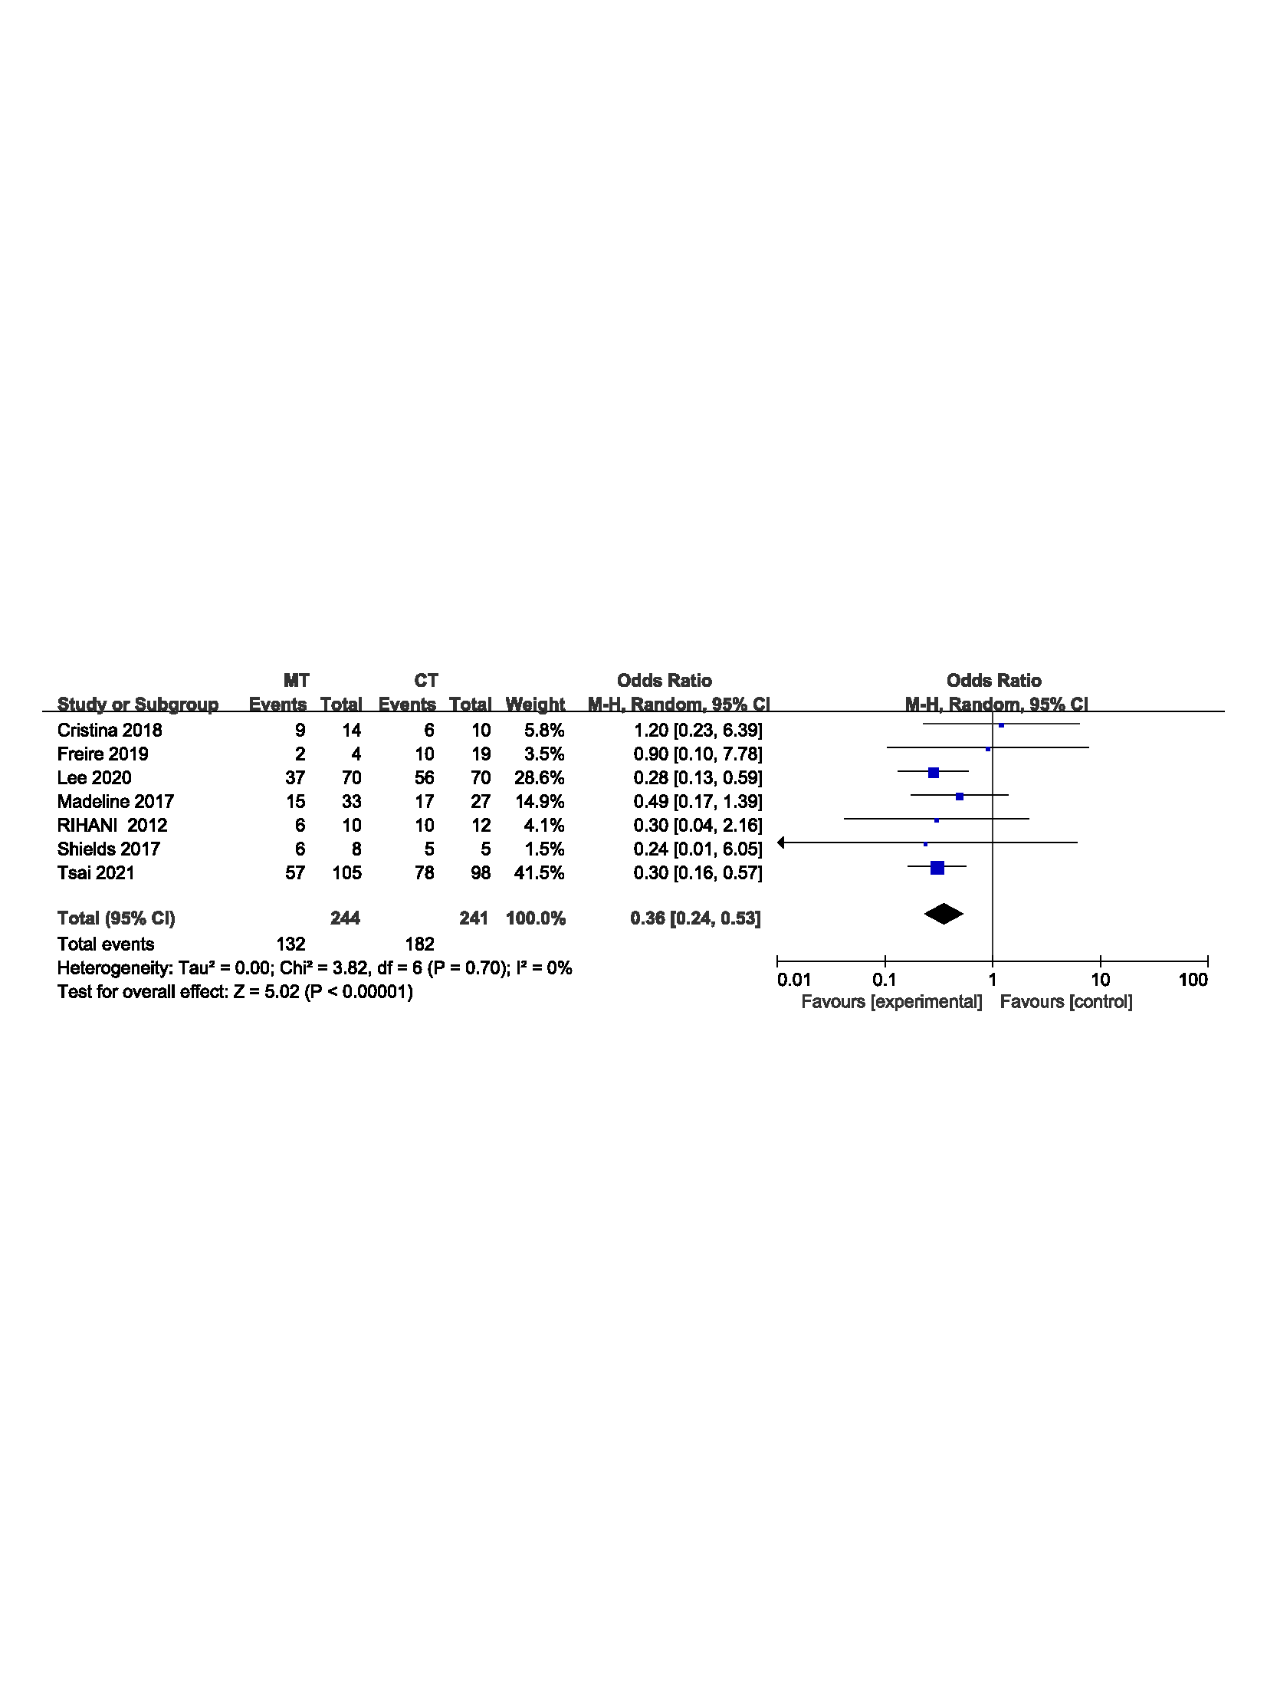


**eFigure9. Comparison of clinical success for treating CRE**


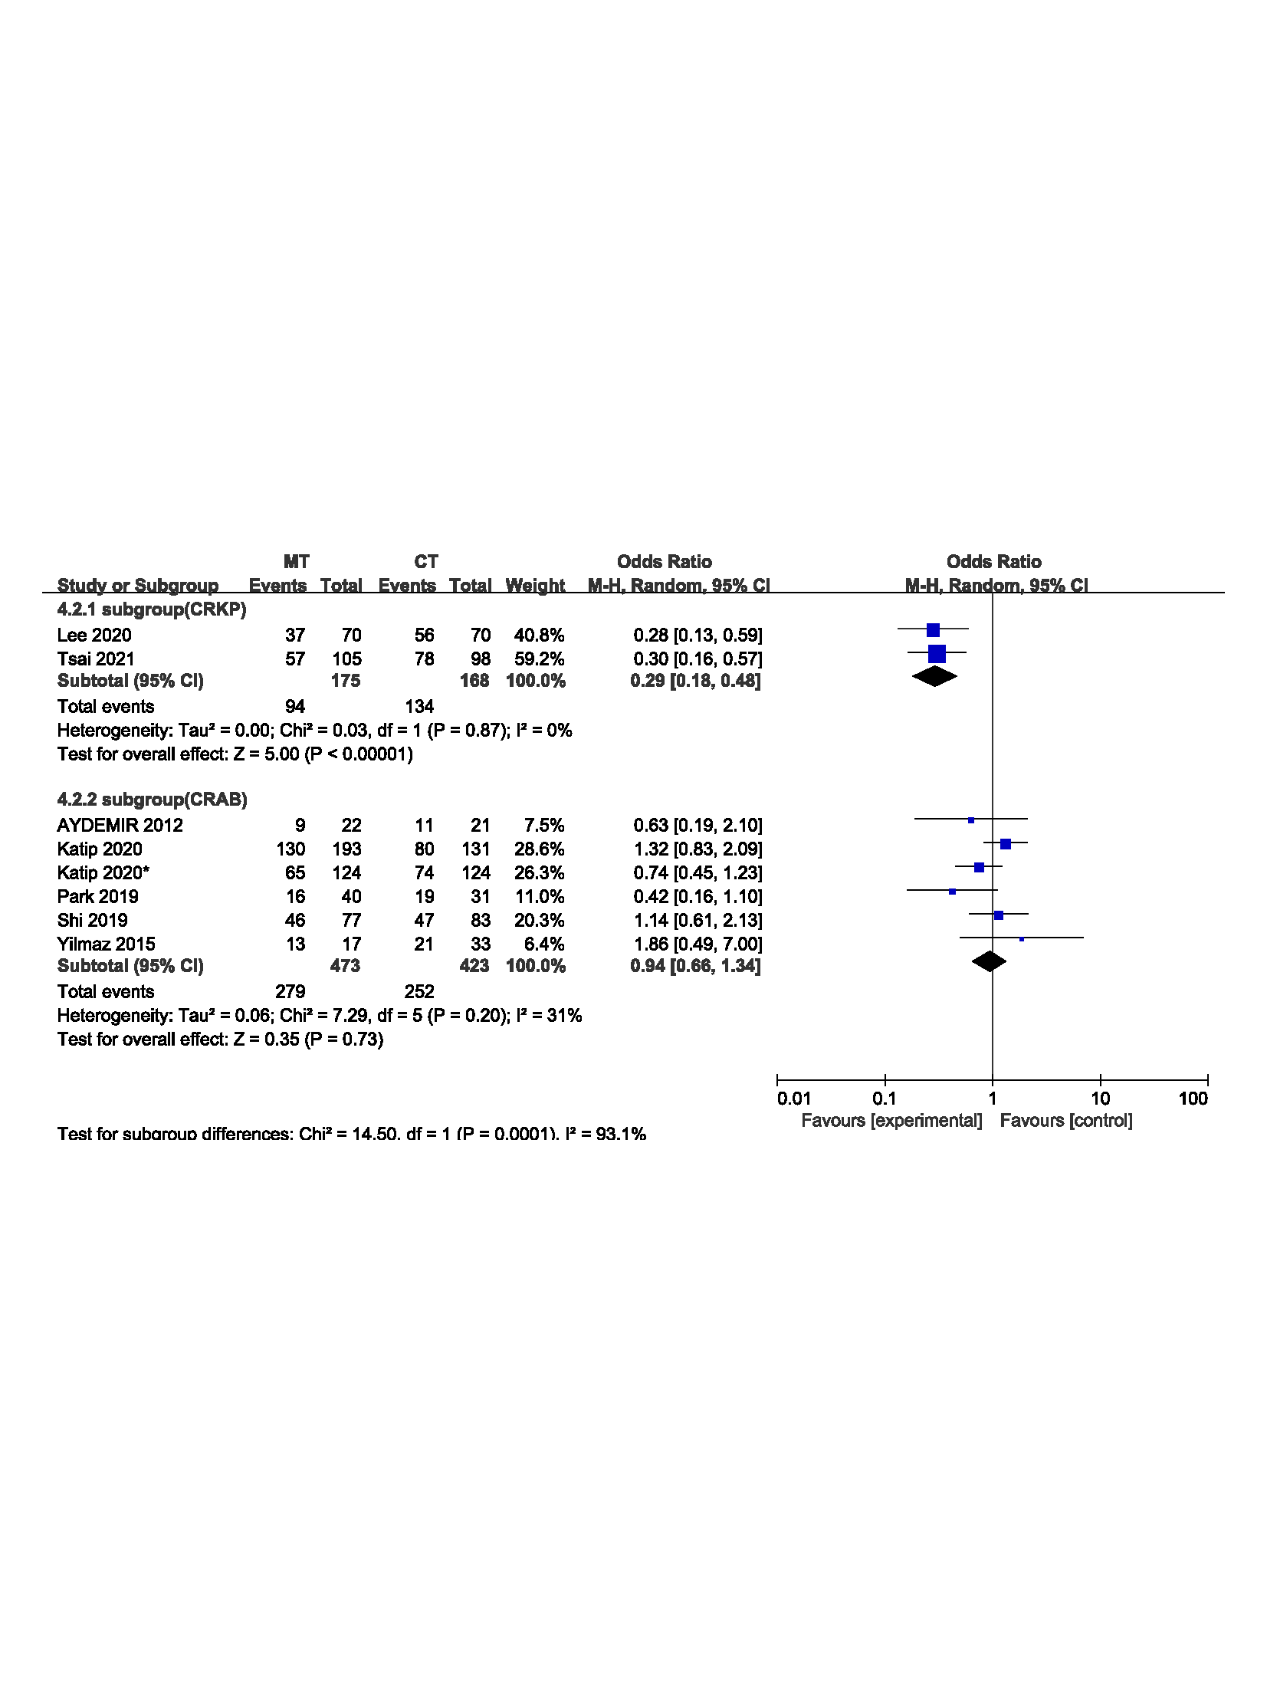


**eFigure10. Comparison of clinical success for specific organisms**


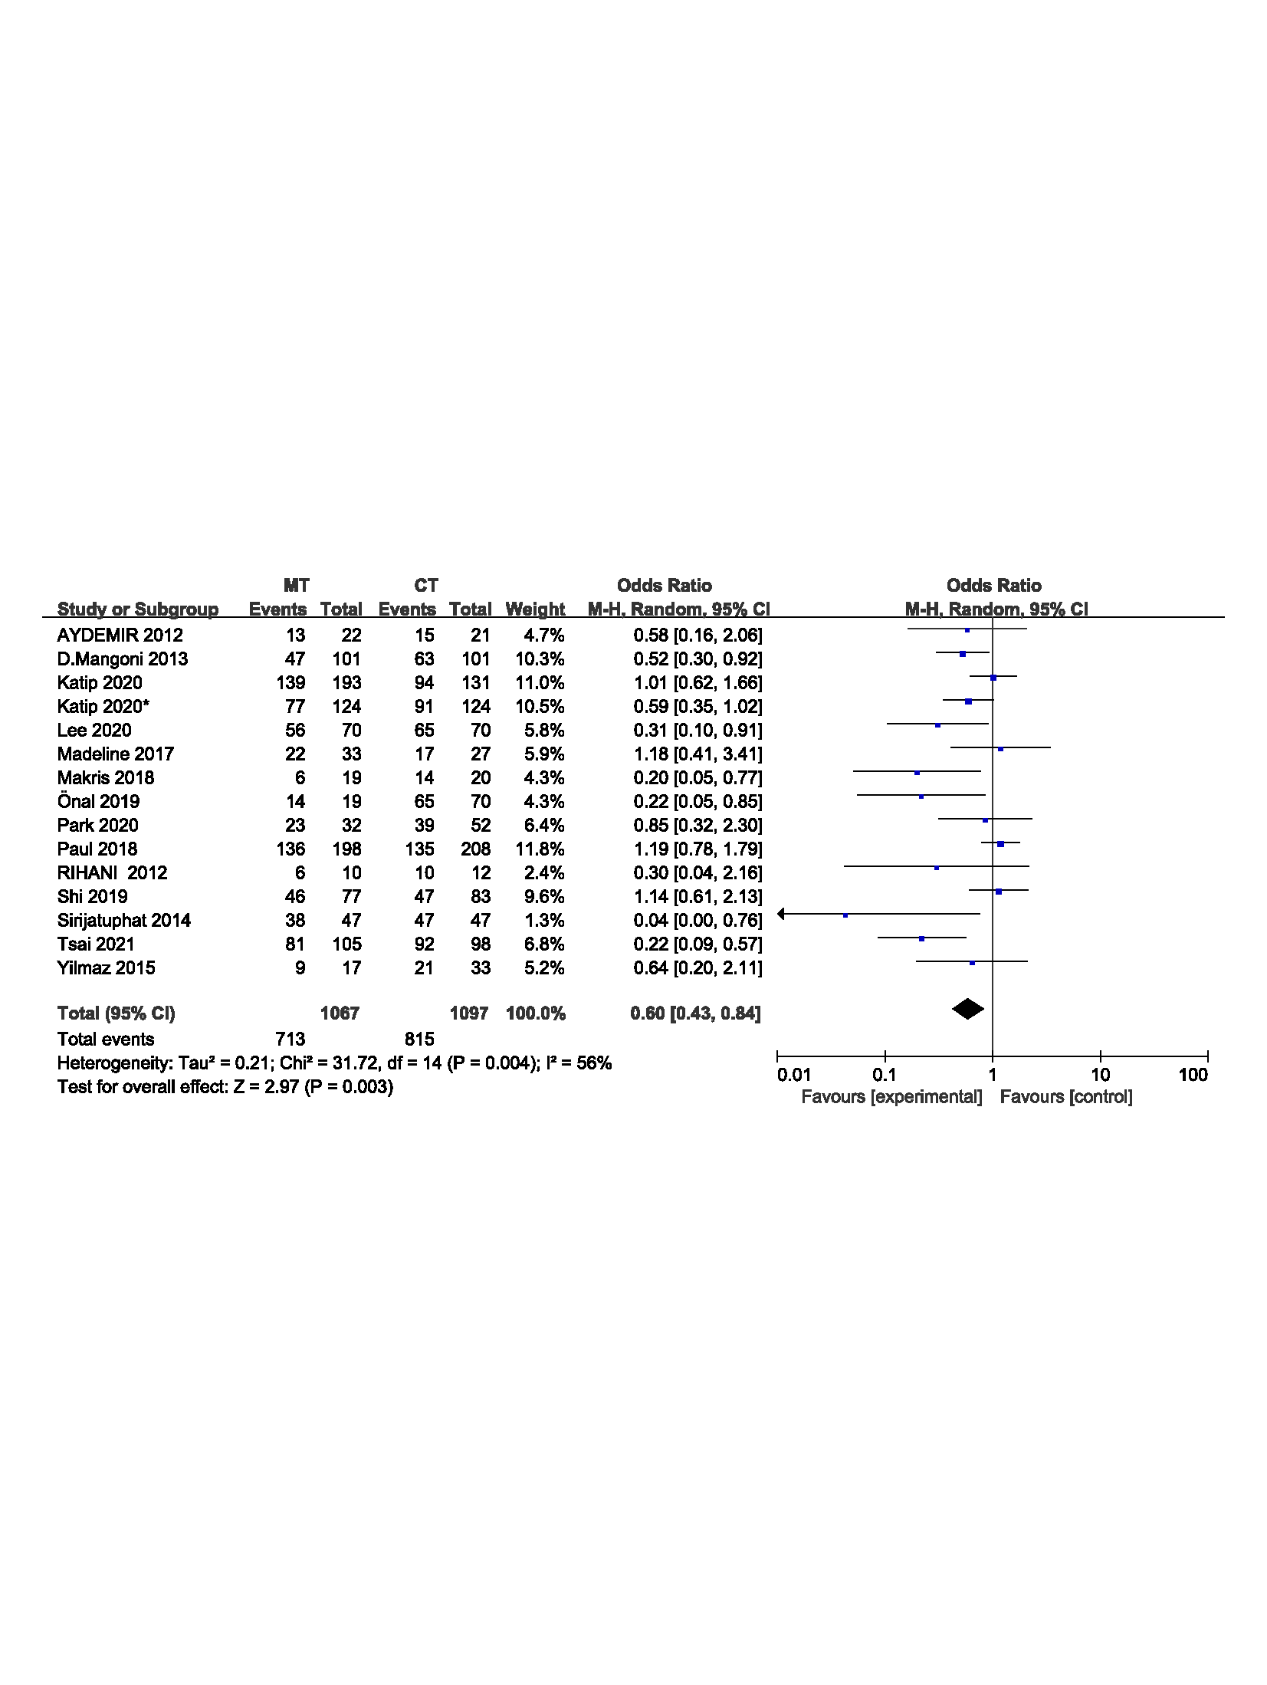


**eFigure11. Comparison of microbiological eradication for treating CRGNB**


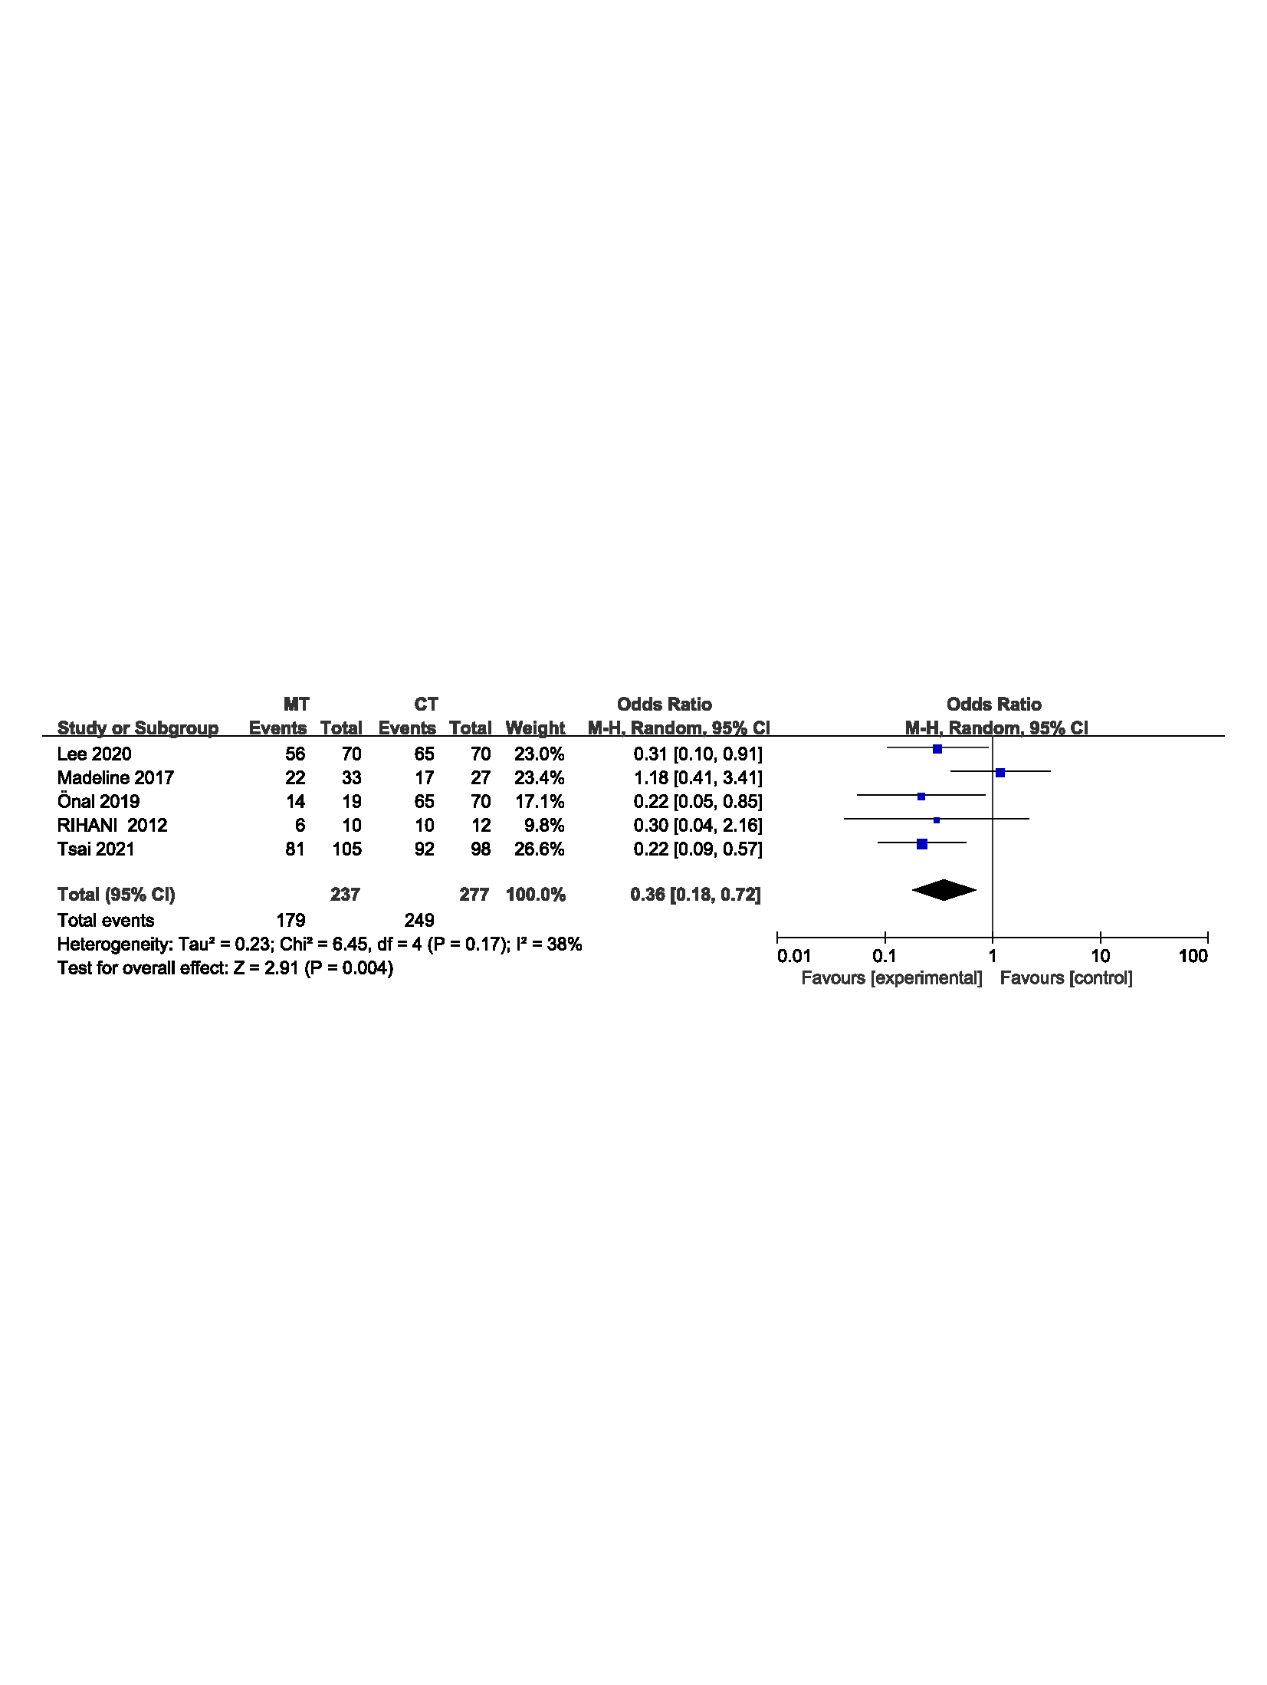


**eFigure12. Comparison of microbiological eradication for treating CRE**


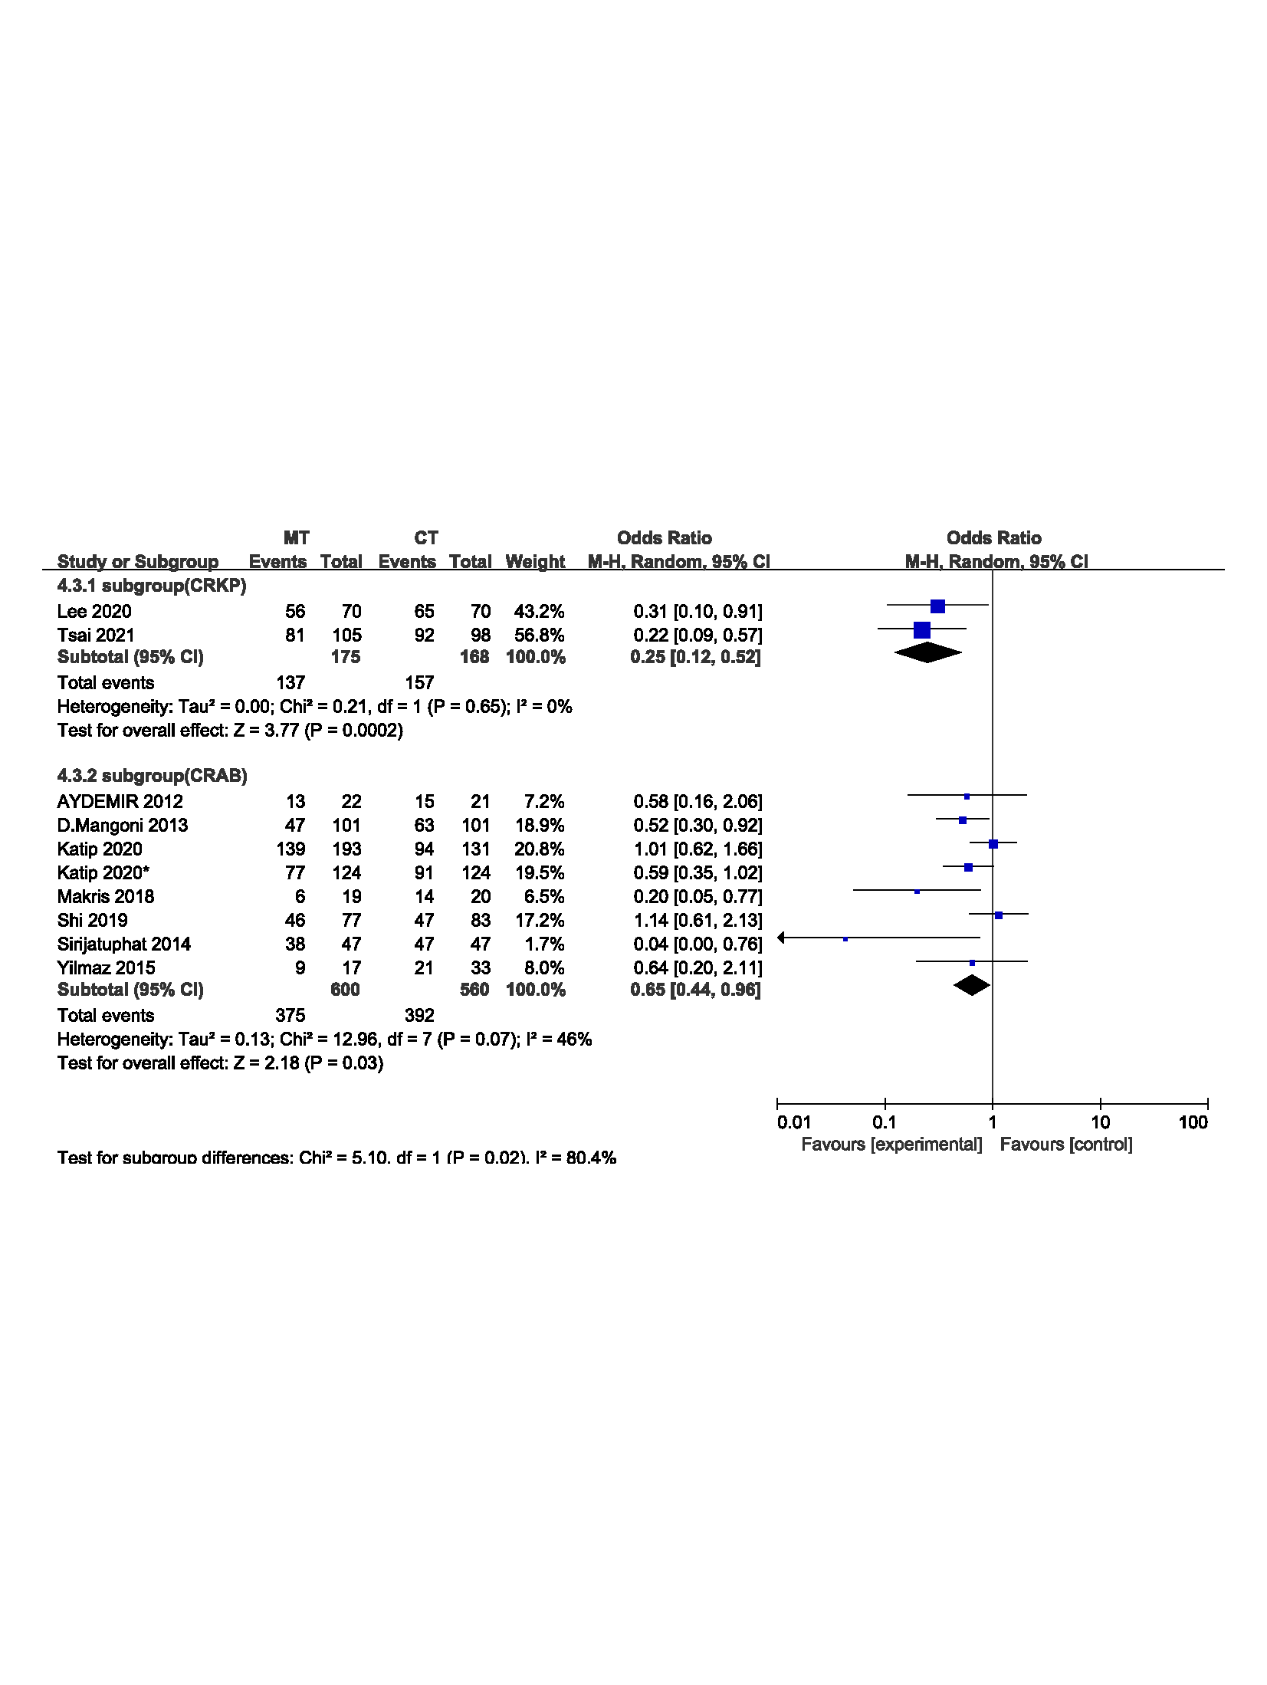


**eFigure13. Comparison of microbiological eradication for specific organisms**
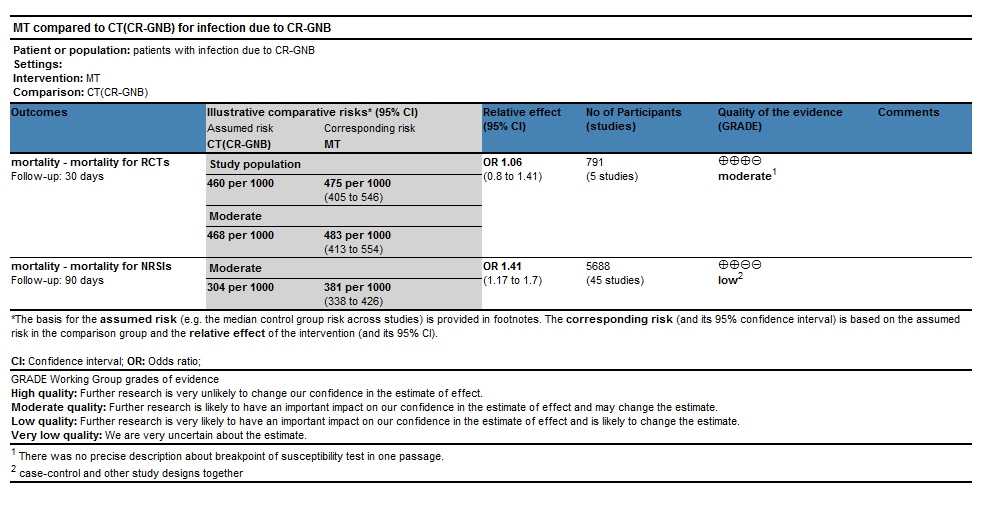


**eFigure14. GRADE summary of findings on mortality (5 RCTs, 45 NRSIs)**
